# Supplementary material for: CD4 T-cell transcriptome analysis reveals aberrant regulation of STAT3 and Wnt signaling pathways in rheumatoid arthritis: evidence from a case–control study
Source: Arthritis Res Ther. 2015 Mar 22;17(1):76. doi: 10.1186/s13075-015-0590-9 (PMC4392874; doi:10.1186/s13075-015-0590-9)
Supplement: Additional file 3: Table S3. — A table listing the 832 upregulated genes in rheumatoid arthritis (RA) patients versus healthy controls. [file 13075_2015_590_MOESM3_ESM.xlsx]

## Sheet: Up-regulated DE genes
probe set ID	Gene symbol	Description	p-value	FDR	Geom mean of intensities in rheumatoid arthritis group	Geom mean of intensities in control group	Fold-change	UPorDOWN
225059_at	AGTRAP	angiotensin II receptor-associated protein	0	0	115.84	62.32	1.86	up
235281_x_at	AHNAK	AHNAK nucleoprotein	0	0	350.87	134.23	2.61	up
1552327_at	ARMCX4	armadillo repeat containing, X-linked 4	0	0	36.46	20.8	1.75	up
221764_at	C19orf22	chromosome 19 open reading frame 22	0	0	49.09	14.38	3.41	up
229010_at	CBL	Cas-Br-M (murine) ecotropic retroviral transforming sequence	0	0	158.59	71.41	2.22	up
200745_s_at	GNB1	guanine nucleotide binding protein (G protein), beta polypeptide 1	0	0	94.83	37.03	2.56	up
202736_s_at	LSM4	LSM4 homolog, U6 small nuclear RNA associated (S. cerevisiae)	0	0	123.6	47.14	2.62	up
226508_at	PHC3	polyhomeotic homolog 3 (Drosophila)	0	0	375.34	186.54	2.01	up
230078_at	RAPGEF6	Rap guanine nucleotide exchange factor (GEF) 6	0	0	93.24	45.2	2.06	up
225265_at	RBMS1	RNA binding motif, single stranded interacting protein 1	0	0	24.1	10.05	2.4	up
1556551_s_at	SLC39A6	solute carrier family 39 (zinc transporter), member 6	0	0	35.41	13.49	2.63	up
235653_s_at	THAP6	THAP domain containing 6	0	0	338.32	193.3	1.75	up
224897_at	WDR26	WD repeat domain 26	0	0	31.93	11.33	2.82	up
201295_s_at	WSB1	WD repeat and SOCS box-containing 1	0	0	142.49	40.27	3.54	up
215308_at	XRCC6	X-ray repair complementing defective repair in Chinese hamster cells 6	0	0	26.07	10.07	2.59	up
1556950_s_at	SERPINB6	serpin peptidase inhibitor, clade B (ovalbumin), member 6	1.11022e-16	3.16899e-16	147.58	76.93	1.92	up
229415_at	CYCS	cytochrome c, somatic	2.22045e-16	6.10104e-16	781.81	226.29	3.45	up
227817_at	PRKCB	protein kinase C, beta	2.22045e-16	6.10104e-16	628.36	277.75	2.26	up
204074_s_at	KIAA0562	KIAA0562	5.55112e-16	1.40692e-15	268.51	113.05	2.38	up
212192_at	KCTD12	potassium channel tetramerisation domain containing 12	4.10783e-15	9.58493e-15	273.83	151.74	1.8	up
213446_s_at	IQGAP1	IQ motif containing GTPase activating protein 1	4.55191e-15	1.05375e-14	52.98	24.03	2.2	up
208879_x_at	PRPF6	PRP6 pre-mRNA processing factor 6 homolog (S. cerevisiae)	6.43929e-15	1.42342e-14	789.14	354.69	2.22	up
222830_at	GRHL1	grainyhead-like 1 (Drosophila)	8.32667e-15	1.80003e-14	249.78	144.86	1.72	up
227394_at	NCAM1	neural cell adhesion molecule 1	2.16493e-14	4.38959e-14	150.1	71.64	2.1	up
1556202_at	SRGAP2	SLIT-ROBO Rho GTPase activating protein 2	4.81837e-14	9.444e-14	442.93	204.15	2.17	up
236557_at	ZBTB38	zinc finger and BTB domain containing 38	5.9508e-14	1.15863e-13	26.27	11.22	2.34	up
212990_at	SYNJ1	synaptojanin 1	1.02918e-13	1.95422e-13	126.02	42.68	2.95	up
213328_at	NEK1	NIMA (never in mitosis gene a)-related kinase 1	2.12386e-13	3.92713e-13	327.66	142.49	2.3	up
63825_at	ABHD2	abhydrolase domain containing 2	5.36682e-13	9.621e-13	674.78	261.11	2.58	up
212162_at	KIDINS220	kinase D-interacting substrate, 220kDa	5.691e-13	1.00792e-12	641.47	258.79	2.48	up
214455_at	HIST1H2BC	histone cluster 1, H2bc	7.26974e-13	1.2722e-12	1430.11	805.08	1.78	up
214578_s_at	ROCK1	Rho-associated, coiled-coil containing protein kinase 1	2.59082e-12	4.30339e-12	1426.91	477.73	2.99	up
229937_x_at	LILRB1	Leukocyte immunoglobulin-like receptor, subfamily B (with TM and ITIM domains), member 1	4.52283e-12	7.38728e-12	480.53	220.54	2.18	up
231960_at	BRWD1	bromodomain and WD repeat domain containing 1	5.67391e-12	9.11546e-12	107.71	58.75	1.83	up
227335_at	DIDO1	death inducer-obliterator 1	2.08722e-11	3.19605e-11	166.83	88.9	1.88	up
242911_at	MED13L	mediator complex subunit 13-like	3.14219e-11	4.76187e-11	716.13	300.78	2.38	up
228326_at	WDR27	WD repeat domain 27	4.16099e-10	5.85327e-10	973.85	500.75	1.94	up
34221_at	HMGXB3	HMG box domain containing 3	6.47543e-10	8.93792e-10	346.05	124.49	2.78	up
231736_x_at	MGST1	microsomal glutathione S-transferase 1	8.8806e-10	1.21437e-09	79.98	38.46	2.08	up
230511_at	CREM	cAMP responsive element modulator	2.72474e-09	3.60844e-09	302.38	140.92	2.15	up
214582_at	PDE3B	phosphodiesterase 3B, cGMP-inhibited	2.86102e-09	3.77193e-09	74.22	37.14	2	up
1556183_at	FLJ40330	hypothetical LOC645784	3.00857e-09	3.94874e-09	326.37	172.11	1.9	up
204156_at	SIK3	SIK family kinase 3	3.19121e-09	4.16984e-09	35.37	19.5	1.81	up
227462_at	ERAP2	endoplasmic reticulum aminopeptidase 2	9.20517e-09	1.16652e-08	26.03	14.64	1.78	up
237032_x_at	LOC283567	hypothetical protein LOC283567	3.65689e-08	4.38827e-08	352.9	163.71	2.16	up
208650_s_at	CD24	CD24 molecule	7.37995e-08	8.44243e-08	1348.05	682.39	1.98	up
214814_at	YTHDC1	YTH domain containing 1	8.22843e-08	9.34039e-08	156.89	91.67	1.71	up
212807_s_at	SORT1	sortilin 1	1.71209e-07	1.89231e-07	21.67	12.01	1.8	up
222152_at	PDCD6	Programmed cell death 6	7.86664e-07	8.37968e-07	251.72	143.11	1.76	up
227034_at	ANKRD57	ankyrin repeat domain 57	1e-07	1.69e-06	164.01	84.8	1.93	up
230141_at	ARID4A	AT rich interactive domain 4A (RBP1-like)	1e-07	1.69e-06	225.22	141.1	1.6	up
235430_at	C14orf43	chromosome 14 open reading frame 43	1e-07	1.69e-06	139.72	51.43	2.72	up
1555214_a_at	CLEC7A	C-type lectin domain family 7, member A	1e-07	1.69e-06	35.41	18.85	1.88	up
239027_at	DOCK8	dedicator of cytokinesis 8	1e-07	1.69e-06	106.28	47.08	2.26	up
224863_at	GNAQ	guanine nucleotide binding protein (G protein), q polypeptide	1e-07	1.69e-06	419.58	171.2	2.45	up
225107_at	HNRNPA2B1	heterogeneous nuclear ribonucleoprotein A2/B1	1e-07	1.69e-06	245.04	44.77	5.47	up
212723_at	JMJD6	jumonji domain containing 6	1e-07	1.69e-06	366.56	177.95	2.06	up
232696_at	LOC648556	uncharacterized gastric protein ZA43P	1e-07	1.69e-06	128.69	61.71	2.09	up
212276_at	LPIN1	lipin 1	1e-07	1.69e-06	142.93	81.85	1.75	up
231829_at	MAVS	mitochondrial antiviral signaling protein	1e-07	1.69e-06	124.24	51.22	2.43	up
201297_s_at	MOBKL1B	MOB1, Mps One Binder kinase activator-like 1B (yeast)	1e-07	1.69e-06	56.23	29.06	1.93	up
237591_at	NCRNA00173	non-protein coding RNA 173	1e-07	1.69e-06	187.62	86.28	2.17	up
214657_s_at	NEAT1	nuclear paraspeckle assembly transcript 1 (non-protein coding)	1e-07	1.69e-06	72.95	33.2	2.2	up
51228_at	RBM12B	RNA binding motif protein 12B	1e-07	1.69e-06	467.72	248.47	1.88	up
230323_s_at	TMEM45B	transmembrane protein 45B	1e-07	1.69e-06	303.83	153.67	1.98	up
217147_s_at	TRAT1	T cell receptor associated transmembrane adaptor 1	1e-07	1.69e-06	225.72	110.96	2.03	up
227740_at	UHMK1	U2AF homology motif (UHM) kinase 1	1e-07	1.69e-06	180.29	80.26	2.25	up
231899_at	ZC3H12C	zinc finger CCCH-type containing 12C	1e-07	1.69e-06	340.43	159.33	2.14	up
244738_at	BRWD3	bromodomain and WD repeat domain containing 3	2e-07	3.05e-06	544.9	167.5	3.25	up
228561_at	CDC37L1	cell division cycle 37 homolog (S. cerevisiae)-like 1	2e-07	3.05e-06	132.45	61.91	2.14	up
216607_s_at	CYP51A1	cytochrome P450, family 51, subfamily A, polypeptide 1	2e-07	3.05e-06	138.53	69.68	1.99	up
33646_g_at	GM2A	GM2 ganglioside activator	2e-07	3.05e-06	96.2	49.34	1.95	up
227110_at	HNRNPC	heterogeneous nuclear ribonucleoprotein C (C1/C2)	2e-07	3.05e-06	44.62	22.33	2	up
229776_at	SLCO3A1	solute carrier organic anion transporter family, member 3A1	2e-07	3.05e-06	28.1	11.49	2.45	up
227112_at	TMCC1	transmembrane and coiled-coil domain family 1	2e-07	3.05e-06	118.88	64.65	1.84	up
201831_s_at	USO1	USO1 vesicle docking protein homolog (yeast)	2e-07	3.05e-06	474.19	211.27	2.24	up
1554433_a_at	ZNF146	zinc finger protein 146	2e-07	3.05e-06	568.94	284.19	2	up
215716_s_at	ATP2B1	ATPase, Ca++ transporting, plasma membrane 1	3e-07	4.32e-06	125.79	74.45	1.69	up
225377_at	C9orf86	chromosome 9 open reading frame 86	3e-07	4.32e-06	121.13	52.4	2.31	up
227741_at	PTPLB	protein tyrosine phosphatase-like (proline instead of catalytic arginine), member b	3e-07	4.32e-06	1881.42	790.18	2.38	up
234306_s_at	SLAMF7	SLAM family member 7	3e-07	4.32e-06	155.82	84.52	1.84	up
226180_at	WDR36	WD repeat domain 36	3e-07	4.32e-06	63.12	37.07	1.7	up
243648_at	ZBED6	zinc finger, BED domain containing 6	3e-07	4.32e-06	76.25	34.12	2.23	up
227626_at	PAQR8	progestin and adipoQ receptor family member VIII	4.74955e-06	5.0229e-06	64.18	35.12	1.83	up
216902_s_at	RRN3	RRN3 RNA polymerase I transcription factor homolog (S. cerevisiae)	4e-07	5.59e-06	27.45	14.52	1.89	up
1556499_s_at	COL1A1	collagen, type I, alpha 1	5e-07	6.82e-06	31.09	15.87	1.96	up
225470_at	NUP35	nucleoporin 35kDa	5e-07	6.82e-06	24.72	14.18	1.74	up
222074_at	UROD	uroporphyrinogen decarboxylase	5e-07	6.82e-06	582.03	331.82	1.75	up
216620_s_at	ARHGEF10	Rho guanine nucleotide exchange factor (GEF) 10	6e-07	7.97e-06	72.19	36.65	1.97	up
217584_at	NPC1	Niemann-Pick disease, type C1	6e-07	7.97e-06	1055.15	519.8	2.03	up
231830_x_at	RAB11FIP1	RAB11 family interacting protein 1 (class I)	6e-07	7.97e-06	38.07	15.05	2.53	up
228480_at	VAPA	VAMP (vesicle-associated membrane protein)-associated protein A, 33kDa	6e-07	7.97e-06	50.61	26.11	1.94	up
212113_at	ATXN7L3B	ataxin 7-like 3B	7e-07	9.11e-06	222.07	100.06	2.22	up
211949_s_at	NOLC1	nucleolar and coiled-body phosphoprotein 1	7e-07	9.11e-06	50.16	18.43	2.72	up
202066_at	PPFIA1	protein tyrosine phosphatase, receptor type, f polypeptide (PTPRF), interacting protein (liprin), alpha 1	7e-07	9.11e-06	147.03	50.65	2.9	up
201593_s_at	ZC3H15	zinc finger CCCH-type containing 15	7e-07	9.11e-06	144.42	58.63	2.46	up
238545_at	BRD7	Bromodomain containing 7	8e-07	1.01e-05	400.67	217.14	1.85	up
226099_at	ELL2	elongation factor, RNA polymerase II, 2	8e-07	1.01e-05	76.27	44.58	1.71	up
213447_at	IPW	imprinted in Prader-Willi syndrome (non-protein coding)	8e-07	1.01e-05	168.09	94.56	1.78	up
230292_at	LOC100131993	similar to hCG2020760	9e-07	1.11e-05	134.94	76.78	1.76	up
225314_at	OCIAD2	OCIA domain containing 2	9e-07	1.11e-05	130.46	76.02	1.72	up
216748_at	PYHIN1	pyrin and HIN domain family, member 1	9e-07	1.11e-05	66.11	33.1	2	up
222593_s_at	SPATS2	spermatogenesis associated, serine-rich 2	9e-07	1.11e-05	83.09	31.94	2.6	up
202969_at	DYRK2	dual-specificity tyrosine-(Y)-phosphorylation regulated kinase 2	1e-06	1.21e-05	40.55	23.64	1.72	up
213089_at	LOC100272216	hypothetical LOC100272216	1e-06	1.21e-05	336.02	158.71	2.12	up
212385_at	TCF4	transcription factor 4	1e-06	1.21e-05	28.8	13.62	2.11	up
203975_s_at	CHAF1A	chromatin assembly factor 1, subunit A (p150)	1.1e-06	1.3e-05	376.14	138.14	2.72	up
231920_s_at	CSNK1G1	casein kinase 1, gamma 1	1.1e-06	1.3e-05	23.47	10.21	2.3	up
212106_at	FAF2	Fas associated factor family member 2	1.1e-06	1.3e-05	27.01	10.66	2.53	up
227954_at	ITPRIPL2	inositol 1,4,5-triphosphate receptor interacting protein-like 2	1.2e-06	1.4e-05	85.88	40.66	2.11	up
201683_x_at	TOX4	TOX high mobility group box family member 4	1.2e-06	1.4e-05	85.3	36.77	2.32	up
238681_at	GDPD1	glycerophosphodiester phosphodiesterase domain containing 1	1.3e-06	1.5e-05	63.07	35.13	1.8	up
200842_s_at	EPRS	glutamyl-prolyl-tRNA synthetase	1.4e-06	1.6e-05	771.46	345.25	2.23	up
203479_s_at	OTUD4	OTU domain containing 4	1.4e-06	1.6e-05	125.34	52.85	2.37	up
1552263_at	MAPK1	mitogen-activated protein kinase 1	1.62958e-05	1.69292e-05	1149.24	661.65	1.74	up
226031_at	CCDC132	coiled-coil domain containing 132	1.6e-06	1.79e-05	471.07	250.26	1.88	up
212642_s_at	HIVEP2	human immunodeficiency virus type I enhancer binding protein 2	1.6e-06	1.79e-05	521.45	294.72	1.77	up
208765_s_at	HNRNPR	heterogeneous nuclear ribonucleoprotein R	1.7e-06	1.89e-05	199.18	81.77	2.44	up
226117_at	TIFA	TRAF-interacting protein with forkhead-associated domain	1.7e-06	1.89e-05	278.46	149.6	1.86	up
215047_at	TRIM58	tripartite motif-containing 58	1.7e-06	1.89e-05	272.06	147.84	1.84	up
1556698_a_at	GPRIN3	GPRIN family member 3	1.9e-06	2.09e-05	89.27	51.39	1.74	up
216834_at	RGS1	regulator of G-protein signaling 1	1.9e-06	2.09e-05	71.69	42.75	1.68	up
222538_s_at	APPL1	adaptor protein, phosphotyrosine interaction, PH domain and leucine zipper containing 1	2e-06	2.18e-05	842.06	325.1	2.59	up
213623_at	KIF3A	kinesin family member 3A	2e-06	2.18e-05	173.94	98.95	1.76	up
237403_at	GFI1B	growth factor independent 1B transcription repressor	2.1e-06	2.27e-05	108.53	60.53	1.79	up
1556319_at	LOC283270	hypothetical protein LOC283270	2.3e-06	2.42e-05	482.23	272.38	1.77	up
213672_at	MARS	methionyl-tRNA synthetase	2.3e-06	2.42e-05	115	25.36	4.53	up
239392_s_at	POGK	pogo transposable element with KRAB domain	2.3e-06	2.42e-05	34.44	14.67	2.35	up
201456_s_at	BUB3	budding uninhibited by benzimidazoles 3 homolog (yeast)	2.4e-06	2.48e-05	198.99	108.95	1.83	up
225115_at	HIPK2	homeodomain interacting protein kinase 2	2.4e-06	2.48e-05	63.16	26.76	2.36	up
214937_x_at	PCM1	pericentriolar material 1	2.4e-06	2.48e-05	210.67	72.58	2.9	up
212977_at	CXCR7	chemokine (C-X-C motif) receptor 7	2.5e-06	2.56e-05	257.06	121.7	2.11	up
216860_s_at	GDF11	growth differentiation factor 11	2.5e-06	2.56e-05	432.52	254.5	1.7	up
213295_at	CYLD	cylindromatosis (turban tumor syndrome)	2.6e-06	2.64e-05	133.68	77.22	1.73	up
232412_at	FBXL20	F-box and leucine-rich repeat protein 20	2.6e-06	2.64e-05	31.9	13.51	2.36	up
225095_at	SPTLC2	Serine palmitoyltransferase, long chain base subunit 2	2.6e-06	2.64e-05	159.69	88.6	1.8	up
241869_at	APOL6	apolipoprotein L, 6	2.8e-06	2.83e-05	664.48	293.58	2.26	up
239186_at	MGC39372	hypothetical protein MGC39372	2.8e-06	2.83e-05	192.72	111.88	1.72	up
222508_s_at	ARGLU1	arginine and glutamate rich 1	2.9e-06	2.91e-05	151.16	66.82	2.26	up
221802_s_at	KIAA1598	KIAA1598	2.9e-06	2.91e-05	23.47	10.85	2.16	up
1553107_s_at	C5orf24	chromosome 5 open reading frame 24	3e-06	2.99e-05	256.59	115.22	2.23	up
232053_x_at	RHBDD2	rhomboid domain containing 2	3e-06	2.99e-05	87.38	48.39	1.81	up
228486_at	SLC44A1	solute carrier family 44, member 1	3.1e-06	3.06e-05	276.73	140.44	1.97	up
1555274_a_at	EPT1	ethanolaminephosphotransferase 1 (CDP-ethanolamine-specific)	3.2e-06	3.15e-05	62.48	35.37	1.77	up
214447_at	ETS1	v-ets erythroblastosis virus E26 oncogene homolog 1 (avian)	3.3e-06	3.23e-05	49.57	22.19	2.23	up
235547_at	N4BP2L2	NEDD4 binding protein 2-like 2	3.3e-06	3.23e-05	308.34	154.45	2	up
1557910_at	HSP90AB1	heat shock protein 90kDa alpha (cytosolic), class B member 1	3.4e-06	3.32e-05	94.35	42.76	2.21	up
213265_at	PGA3	pepsinogen 3, group I (pepsinogen A)	3.4e-06	3.32e-05	27.24	12.9	2.11	up
225594_at	CREBZF	CREB/ATF bZIP transcription factor	3.5e-06	3.4e-05	83.78	41.91	2	up
228084_at	PLA2G12A	phospholipase A2, group XIIA	3.5e-06	3.4e-05	874.19	396.52	2.2	up
225330_at	IGF1R	insulin-like growth factor 1 receptor	3.6e-06	3.47e-05	26.6	12.78	2.08	up
225074_at	RAB2B	RAB2B, member RAS oncogene family	3.6e-06	3.47e-05	420.04	147.95	2.84	up
208900_s_at	TOP1	topoisomerase (DNA) I	3.6e-06	3.47e-05	29.66	13.27	2.23	up
230550_at	MS4A6A	membrane-spanning 4-domains, subfamily A, member 6A	3.8e-06	3.65e-05	48.58	26.74	1.82	up
1557558_s_at	LOC100129196	similar to hCG2033298	3.9e-06	3.71e-05	376.14	192.27	1.96	up
203742_s_at	TDG	thymine-DNA glycosylase	3.9e-06	3.71e-05	86.37	34.8	2.48	up
213266_at	TUBGCP4	Tubulin, gamma complex associated protein 4	4e-06	3.79e-05	191.64	104.42	1.84	up
233314_at	PTEN	phosphatase and tensin homolog	4.2e-06	3.96e-05	16.36	10.01	1.63	up
238121_at	GK5	glycerol kinase 5 (putative)	4.3e-06	4.04e-05	161.03	96.5	1.67	up
214146_s_at	PPBP	pro-platelet basic protein (chemokine (C-X-C motif) ligand 7)	4.4e-06	4.12e-05	20.82	11.85	1.76	up
227182_at	SUSD3	sushi domain containing 3	4.4e-06	4.12e-05	359.52	171.72	2.09	up
225936_at	EID2	EP300 interacting inhibitor of differentiation 2	4.6e-06	4.25e-05	232.54	132.41	1.76	up
227819_at	LGR6	leucine-rich repeat-containing G protein-coupled receptor 6	4.6e-06	4.25e-05	74.79	36.75	2.04	up
228726_at	SERPINB1	serpin peptidase inhibitor, clade B (ovalbumin), member 1	4.6e-06	4.25e-05	1137.47	651.04	1.75	up
226510_at	HEATR5A	HEAT repeat containing 5A	4.7e-06	4.33e-05	859.77	458.15	1.88	up
228571_at	RBAK	RB-associated KRAB zinc finger	4.8e-06	4.4e-05	73.37	35.44	2.07	up
215633_x_at	LST1	leukocyte specific transcript 1	5e-06	4.55e-05	283.01	162.86	1.74	up
225476_at	BAT4	HLA-B associated transcript 4	5.2e-06	4.7e-05	103.54	40.32	2.57	up
202354_s_at	GTF2F1	general transcription factor IIF, polypeptide 1, 74kDa	5.2e-06	4.7e-05	689.69	309.38	2.23	up
202773_s_at	SFRS8	splicing factor, arginine/serine-rich 8 (suppressor-of-white-apricot homolog, Drosophila)	5.2e-06	4.7e-05	41.28	17.38	2.38	up
227527_at	MLL2	myeloid/lymphoid or mixed-lineage leukemia 2	5.4e-06	4.85e-05	34.82	10.88	3.2	up
1564435_a_at	KRT72	keratin 72	5.6e-06	5e-05	78.19	45.8	1.71	up
227934_at	KPNA5	karyopherin alpha 5 (importin alpha 6)	6.3e-06	5.55e-05	1206.93	616.06	1.96	up
225142_at	JHDM1D	jumonji C domain containing histone demethylase 1 homolog D (S. cerevisiae)	7.5e-06	6.45e-05	228.19	125.3	1.82	up
230888_at	WDR91	WD repeat domain 91	7.6e-06	6.53e-05	29.7	10.25	2.9	up
234726_s_at	TMEM168	transmembrane protein 168	7.7e-06	6.57e-05	188.72	65.87	2.87	up
244046_at	URGCP	upregulator of cell proliferation	8.1e-06	6.89e-05	189.05	114.93	1.64	up
230052_s_at	NFKBID	nuclear factor of kappa light polypeptide gene enhancer in B-cells inhibitor, delta	8.3e-06	7.03e-05	28.35	13.79	2.06	up
232028_at	ZNF678	zinc finger protein 678	8.4e-06	7.1e-05	113.65	52.25	2.17	up
225253_s_at	METTL2A	methyltransferase like 2A	8.5e-06	7.15e-05	375.48	155.83	2.41	up
225360_at	TRABD	TraB domain containing	9.2e-06	7.66e-05	777.05	278.83	2.79	up
238461_at	EIF4E3	eukaryotic translation initiation factor 4E family member 3	9.7e-06	8.01e-05	247.07	115.15	2.15	up
225539_at	ZNF295	zinc finger protein 295	9.7e-06	8.01e-05	20.65	11.02	1.87	up
238642_at	ANKRD13D	ankyrin repeat domain 13 family, member D	9.9e-06	8.16e-05	164.66	101.2	1.63	up
221826_at	ANGEL2	angel homolog 2 (Drosophila)	1e-05	8.23e-05	55.76	14.82	3.76	up
213539_at	CD3D	CD3d molecule, delta (CD3-TCR complex)	1.02e-05	8.36e-05	110.73	62.61	1.77	up
222790_s_at	RSBN1	round spermatid basic protein 1	1.06e-05	8.65e-05	88.42	53.35	1.66	up
1557586_s_at	ATP6V1H	ATPase, H+ transporting, lysosomal 50/57kDa, V1 subunit H	1.07e-05	8.71e-05	415.86	193.23	2.15	up
238049_at	GRAMD3	GRAM domain containing 3	1.08e-05	8.78e-05	33.27	18.31	1.82	up
228948_at	EPHA4	EPH receptor A4	1.09e-05	8.83e-05	17.67	10.17	1.74	up
226152_at	TTC7B	tetratricopeptide repeat domain 7B	1.09e-05	8.83e-05	123.96	61.57	2.01	up
208624_s_at	EIF4G1	eukaryotic translation initiation factor 4 gamma, 1	1.1e-05	8.88e-05	160.47	71.63	2.24	up
225354_s_at	SH3BGRL2	SH3 domain binding glutamic acid-rich protein like 2	1.11e-05	8.95e-05	17.63	10.78	1.64	up
201182_s_at	CHD4	chromodomain helicase DNA binding protein 4	1.13e-05	9.09e-05	149.69	61.25	2.44	up
212332_at	RBL2	retinoblastoma-like 2 (p130)	1.2e-05	9.58e-05	120.89	52.98	2.28	up
238303_at	STT3B	STT3, subunit of the oligosaccharyltransferase complex, homolog B (S. cerevisiae)	1.2e-05	9.58e-05	435.54	235.04	1.85	up
226791_at	KIFC2	kinesin family member C2	1.23e-05	9.79e-05	1857.46	553.39	3.36	up
228532_at	C1orf162	chromosome 1 open reading frame 162	1.26e-05	9.99e-05	19.94	10.17	1.96	up
1552480_s_at	PTPRC	protein tyrosine phosphatase, receptor type, C	1.28e-05	0.000101	81.23	42.92	1.89	up
226452_at	PDK1	pyruvate dehydrogenase kinase, isozyme 1	1.34e-05	0.000105	69.88	34.31	2.04	up
1563088_a_at	LOC284837	hypothetical LOC284837	1.36e-05	0.000106	84.38	50.7	1.66	up
201476_s_at	RRM1	ribonucleotide reductase M1	1.39e-05	0.000108	107.9	64.65	1.67	up
222027_at	NUCKS1	Nuclear casein kinase and cyclin-dependent kinase substrate 1	1.45e-05	0.000112	73.07	30.59	2.39	up
1554997_a_at	PTGS2	prostaglandin-endoperoxide synthase 2 (prostaglandin G/H synthase and cyclooxygenase)	1.46e-05	0.000113	131.85	69.06	1.91	up
228245_s_at	OVOS	ovostatin	1.48e-05	0.000114	217.45	129.34	1.68	up
232666_at	OAS3	2'-5'-oligoadenylate synthetase 3, 100kDa	1.49e-05	0.000115	140.44	81.59	1.72	up
230645_at	FRMD3	FERM domain containing 3	1.5e-05	0.000116	21.98	11.18	1.97	up
209024_s_at	SYNCRIP	synaptotagmin binding, cytoplasmic RNA interacting protein	1.51e-05	0.000116	99.83	43.32	2.3	up
200874_s_at	NOP56	NOP56 ribonucleoprotein homolog (yeast)	1.53e-05	0.000117	87.47	34.22	2.56	up
221739_at	C19orf10	chromosome 19 open reading frame 10	1.54e-05	0.000118	91.48	38.24	2.39	up
235470_at	NAA38	N(alpha)-acetyltransferase 38, NatC auxiliary subunit	1.59e-05	0.000121	160.78	79.19	2.03	up
232038_at	C6orf170	chromosome 6 open reading frame 170	1.61e-05	0.000122	42.15	23.61	1.78	up
215075_s_at	GRB2	growth factor receptor-bound protein 2	1.62e-05	0.000122	185.25	78.62	2.36	up
1562031_at	JAK2	Janus kinase 2	1.61e-05	0.000122	150.18	80.53	1.87	up
242121_at	NCRNA00182	non-protein coding RNA 182	1.61e-05	0.000122	114.99	62.1	1.85	up
244840_x_at	DOCK4	dedicator of cytokinesis 4	1.65e-05	0.000124	38	21.11	1.8	up
224854_s_at	SLAIN2	SLAIN motif family, member 2	1.67e-05	0.000126	25.74	11.01	2.34	up
226216_at	INSR	insulin receptor	1.73e-05	0.00013	141.96	79.03	1.8	up
229628_s_at	KIAA1529	KIAA1529	1.77e-05	0.000132	22.51	13.35	1.69	up
225688_s_at	PHLDB2	pleckstrin homology-like domain, family B, member 2	1.78e-05	0.000132	48.49	28.85	1.68	up
228708_at	RAB27B	RAB27B, member RAS oncogene family	1.77e-05	0.000132	363.92	201.41	1.81	up
242335_at	SLC25A37	solute carrier family 25, member 37	1.81e-05	0.000134	56.08	29.88	1.88	up
241742_at	PRAM1	PML-RARA regulated adaptor molecule 1	1.82e-05	0.000135	273.56	150.12	1.82	up
212279_at	TMEM97	transmembrane protein 97	1.98e-05	0.000144	37.67	15.23	2.47	up
243038_at	RBM43	RNA binding motif protein 43	1.99e-05	0.000145	54.1	22.57	2.4	up
229215_at	ASCL2	achaete-scute complex homolog 2 (Drosophila)	2.02e-05	0.000147	128.79	66.61	1.93	up
232914_s_at	SYTL2	synaptotagmin-like 2	2.03e-05	0.000147	20.32	11.06	1.84	up
49306_at	RASSF4	Ras association (RalGDS/AF-6) domain family member 4	2.05e-05	0.000148	187.28	84.81	2.21	up
232165_at	EPPK1	epiplakin 1	2.15e-05	0.000155	44.88	23.57	1.9	up
200727_s_at	ACTR2	ARP2 actin-related protein 2 homolog (yeast)	2.28e-05	0.000163	181.17	73.45	2.47	up
239283_at	TMED5	transmembrane emp24 protein transport domain containing 5	2.28e-05	0.000163	81.15	42.83	1.89	up
230789_at	ZNF280B	zinc finger protein 280B	2.29e-05	0.000164	116.34	66.02	1.76	up
226507_at	PAK1	p21 protein (Cdc42/Rac)-activated kinase 1	2.33e-05	0.000166	27.51	16.27	1.69	up
236006_s_at	AKAP10	A kinase (PRKA) anchor protein 10	2.35e-05	0.000167	93.65	55.75	1.68	up
214246_x_at	MINK1	misshapen-like kinase 1 (zebrafish)	2.34e-05	0.000167	2163.96	632.15	3.42	up
1566603_s_at	RPUSD3	RNA pseudouridylate synthase domain containing 3	2.35e-05	0.000167	66.59	24.83	2.68	up
226153_s_at	CNOT6L	CCR4-NOT transcription complex, subunit 6-like	2.42e-05	0.00017	33.55	16.51	2.03	up
228284_at	TLE1	transducin-like enhancer of split 1 (E(sp1) homolog, Drosophila)	0.000174788	0.000179677	81.89	40.18	2.04	up
228686_at	FLJ33630	hypothetical LOC644873	2.66e-05	0.000186	26.69	16.34	1.63	up
36829_at	PER1	period homolog 1 (Drosophila)	2.69e-05	0.000187	19.32	11.97	1.61	up
228222_at	PPP1CB	Protein phosphatase 1, catalytic subunit, beta isozyme	2.68e-05	0.000187	48.48	26.8	1.81	up
215209_at	SEC24D	SEC24 family, member D (S. cerevisiae)	2.81e-05	0.000194	338.67	188.86	1.79	up
212187_x_at	PTGDS	prostaglandin D2 synthase 21kDa (brain)	2.9e-05	0.000199	55.7	30.95	1.8	up
226054_at	BRD4	bromodomain containing 4	2.92e-05	0.0002	59.33	22.2	2.67	up
209498_at	CEACAM1	carcinoembryonic antigen-related cell adhesion molecule 1 (biliary glycoprotein)	3.14e-05	0.000214	35.41	16.65	2.13	up
1555041_a_at	NAGA	N-acetylgalactosaminidase, alpha-	3.24e-05	0.000219	54.83	28.62	1.92	up
222499_at	MRPS16	mitochondrial ribosomal protein S16	3.3e-05	0.000223	194.95	80.67	2.42	up
1555659_a_at	TREML1	triggering receptor expressed on myeloid cells-like 1	3.31e-05	0.000223	32.6	17.31	1.88	up
212774_at	ZNF238	zinc finger protein 238	3.45e-05	0.000232	26.88	14.43	1.86	up
212589_at	RRAS2	related RAS viral (r-ras) oncogene homolog 2	3.63e-05	0.000242	305.39	180.77	1.69	up
226275_at	MXD1	MAX dimerization protein 1	3.65e-05	0.000243	67.6	38.4	1.76	up
227492_at	OCLN	occludin	3.66e-05	0.000243	587.26	305.98	1.92	up
1562255_at	SYTL3	synaptotagmin-like 3	3.91e-05	0.000258	186.88	116.58	1.6	up
238350_at	UBN2	ubinuclein 2	3.92e-05	0.000258	205.69	89.81	2.29	up
227805_at	MAP1D	methionine aminopeptidase 1D	4.06e-05	0.000266	48.33	26.58	1.82	up
201867_s_at	TBL1X	transducin (beta)-like 1X-linked	4.07e-05	0.000267	64.88	26.52	2.45	up
222686_s_at	CPPED1	calcineurin-like phosphoesterase domain containing 1	4.09e-05	0.000268	107.28	65.57	1.64	up
213189_at	MINA	MYC induced nuclear antigen	4.33e-05	0.000282	213.93	118.71	1.8	up
212702_s_at	BICD2	bicaudal D homolog 2 (Drosophila)	4.39e-05	0.000284	348.33	146.22	2.38	up
212492_s_at	KDM4B	lysine (K)-specific demethylase 4B	4.48e-05	0.000289	36.69	16.59	2.21	up
225792_at	HOOK1	hook homolog 1 (Drosophila)	4.51e-05	0.00029	38.16	21.24	1.8	up
240265_at	TRAF3IP3	TRAF3 interacting protein 3	4.54e-05	0.000292	29.06	13.87	2.09	up
229838_at	NUCB2	nucleobindin 2	4.59e-05	0.000295	28.97	15.8	1.83	up
202713_s_at	KIAA0391	KIAA0391	4.64e-05	0.000297	54.14	26.6	2.04	up
41386_i_at	KDM6B	lysine (K)-specific demethylase 6B	4.65e-05	0.000298	117.54	70.2	1.67	up
208615_s_at	PTP4A2	protein tyrosine phosphatase type IVA, member 2	4.7e-05	0.0003	62.46	24.66	2.53	up
215211_at	RRN3P1	RNA polymerase I transcription factor homolog (S. cerevisiae) pseudogene 1	0.000294239	0.000301415	157.77	72.29	2.18	up
234013_at	TRD@	T cell receptor delta locus	4.76e-05	0.000304	47.47	21.6	2.2	up
228645_at	SNHG9	small nucleolar RNA host gene 9 (non-protein coding)	4.79e-05	0.000305	37.8	18.2	2.08	up
1559252_a_at	C20orf29	Chromosome 20 open reading frame 29	4.81e-05	0.000306	50.37	26.66	1.89	up
222816_s_at	ZCCHC2	zinc finger, CCHC domain containing 2	4.82e-05	0.000306	53.99	23.37	2.31	up
1564164_at	DENND1B	DENN/MADD domain containing 1B	5e-05	0.000316	60.75	31.09	1.95	up
1555629_at	HAVCR2	hepatitis A virus cellular receptor 2	5.02e-05	0.000317	80.32	38.88	2.07	up
212307_s_at	OGT	O-linked N-acetylglucosamine (GlcNAc) transferase (UDP-N-acetylglucosamine:polypeptide-N-acetylglucosaminyl transferase)	5.04e-05	0.000317	50.55	14.9	3.39	up
237107_at	PRKRA	protein kinase, interferon-inducible double stranded RNA dependent activator	5.04e-05	0.000317	316.31	198.38	1.59	up
225001_at	RAB3D	RAB3D, member RAS oncogene family	5.14e-05	0.000323	234.67	151.93	1.54	up
57715_at	CALHM2	calcium homeostasis modulator 2	5.28e-05	0.00033	406.44	199.03	2.04	up
228263_at	GRASP	GRP1 (general receptor for phosphoinositides 1)-associated scaffold protein	5.29e-05	0.00033	63.56	33.61	1.89	up
58780_s_at	FLJ10357	protein SOLO	5.43e-05	0.000336	35.28	16.46	2.14	up
217683_at	HBE1	Hemoglobin, epsilon 1	5.5e-05	0.00034	132.17	59.95	2.2	up
225484_at	TSGA14	testis specific, 14	5.6e-05	0.000345	36.95	20.57	1.8	up
238030_at	ZNF268	zinc finger protein 268	5.74e-05	0.000353	35.64	22.06	1.62	up
216450_x_at	HSP90B1	heat shock protein 90kDa beta (Grp94), member 1	5.9e-05	0.000362	66.72	28.32	2.36	up
37117_at	ARHGAP8	Rho GTPase activating protein 8	6e-05	0.000367	54.57	32.82	1.66	up
1559739_at	CHPT1	Choline phosphotransferase 1	6.17e-05	0.000376	26.51	14.81	1.79	up
222621_at	DNAJC1	DnaJ (Hsp40) homolog, subfamily C, member 1	6.17e-05	0.000376	671.91	254.46	2.64	up
64408_s_at	CALML4	calmodulin-like 4	6.27e-05	0.000381	117.65	55.81	2.11	up
231297_at	DOT1L	DOT1-like, histone H3 methyltransferase (S. cerevisiae)	6.28e-05	0.000381	598.76	329.5	1.82	up
229778_at	C12orf39	chromosome 12 open reading frame 39	6.36e-05	0.000385	175.1	82.99	2.11	up
1555906_s_at	C3orf23	chromosome 3 open reading frame 23	6.55e-05	0.000395	106.32	64.16	1.66	up
225774_at	RSPRY1	ring finger and SPRY domain containing 1	6.57e-05	0.000396	480.42	153.04	3.14	up
228029_at	ZNF721	zinc finger protein 721	6.67e-05	0.000401	30.93	16.57	1.87	up
233292_s_at	ANKHD1	ankyrin repeat and KH domain containing 1	6.77e-05	0.000406	136.87	65.05	2.1	up
228618_at	PEAR1	platelet endothelial aggregation receptor 1	6.79e-05	0.000407	84.43	44.02	1.92	up
225041_at	MPHOSPH8	M-phase phosphoprotein 8	6.82e-05	0.000408	69.75	37.27	1.87	up
214764_at	RRP15	ribosomal RNA processing 15 homolog (S. cerevisiae)	6.9e-05	0.000412	31.41	18.72	1.68	up
215051_x_at	AIF1	allograft inflammatory factor 1	7.11e-05	0.000424	63.5	38.03	1.67	up
213503_x_at	ANXA2	annexin A2	7.35e-05	0.000436	372.43	207.72	1.79	up
230523_at	QSOX1	quiescin Q6 sulfhydryl oxidase 1	7.46e-05	0.000441	108.26	58.03	1.87	up
213718_at	RBM4	RNA binding motif protein 4	7.5e-05	0.000443	32.82	12.77	2.57	up
238649_at	PITPNC1	phosphatidylinositol transfer protein, cytoplasmic 1	7.67e-05	0.000452	85.46	53.9	1.59	up
212077_at	CALD1	caldesmon 1	8.02e-05	0.000468	50.83	24.8	2.05	up
231688_at	MMP8	matrix metallopeptidase 8 (neutrophil collagenase)	8.01e-05	0.000468	20.63	13.29	1.55	up
213934_s_at	ZNF23	zinc finger protein 23 (KOX 16)	8.22e-05	0.000479	34.98	19.84	1.76	up
236154_at	QKI	quaking homolog, KH domain RNA binding (mouse)	8.29e-05	0.000482	736.65	394.37	1.87	up
229882_at	RPS15A	ribosomal protein S15a	8.27e-05	0.000482	33.06	18.18	1.82	up
241385_at	LARP7	La ribonucleoprotein domain family, member 7	8.31e-05	0.000483	115.94	74.34	1.56	up
209999_x_at	SOCS1	suppressor of cytokine signaling 1	8.39e-05	0.000487	19.91	12.44	1.6	up
238694_at	DGKE	diacylglycerol kinase, epsilon 64kDa	8.43e-05	0.000488	68.47	41.82	1.64	up
230556_at	IMMP1L	IMP1 inner mitochondrial membrane peptidase-like (S. cerevisiae)	8.41e-05	0.000488	1599.69	946.02	1.69	up
224661_at	PIGY	phosphatidylinositol glycan anchor biosynthesis, class Y	8.56e-05	0.000494	128.37	49.59	2.59	up
240440_at	NPL	N-acetylneuraminate pyruvate lyase (dihydrodipicolinate synthase)	8.78e-05	0.000505	197.65	107.24	1.84	up
229067_at	SRGAP2P1	SLIT-ROBO Rho GTPase activating protein 2 pseudogene 1	8.81e-05	0.000506	29.27	16.35	1.79	up
244872_at	RBBP4	retinoblastoma binding protein 4	8.83e-05	0.000507	65.28	28.53	2.29	up
227678_at	XRCC6BP1	XRCC6 binding protein 1	9e-05	0.000514	181.74	112.18	1.62	up
214060_at	SSBP1	single-stranded DNA binding protein 1	9.04e-05	0.000516	115.73	65.37	1.77	up
235359_at	LRRC33	leucine rich repeat containing 33	9.38e-05	0.000533	151.9	73.11	2.08	up
233487_s_at	LRRC8A	leucine rich repeat containing 8 family, member A	9.39e-05	0.000533	94.23	38.2	2.47	up
209892_at	FUT4	fucosyltransferase 4 (alpha (1,3) fucosyltransferase, myeloid-specific)	9.46e-05	0.000537	70.31	35.06	2.01	up
241347_at	RNF213	ring finger protein 213	9.51e-05	0.000537	174.22	78.84	2.21	up
204047_s_at	PHACTR2	phosphatase and actin regulator 2	9.59e-05	0.000541	413.53	183.11	2.26	up
214193_s_at	C1orf107	chromosome 1 open reading frame 107	9.66e-05	0.000544	57.32	26.58	2.16	up
241819_at	TNFSF8	tumor necrosis factor (ligand) superfamily, member 8	9.69e-05	0.000546	100.95	56.44	1.79	up
216194_s_at	TBCB	tubulin folding cofactor B	9.79e-05	0.00055	31.7	12.12	2.61	up
213348_at	CDKN1C	cyclin-dependent kinase inhibitor 1C (p57, Kip2)	9.92e-05	0.000556	140.18	77.03	1.82	up
222186_at	ZFAND6	Zinc finger, AN1-type domain 6	0.0001047	0.000584	25.68	15.6	1.65	up
215351_at	RTCD1	RNA terminal phosphate cyclase domain 1	0.0001068	0.000595	197.62	45.28	4.36	up
229367_s_at	GIMAP6	GTPase, IMAP family member 6	0.0001101	0.000613	29.42	14.58	2.02	up
235451_at	SMAD5	SMAD family member 5	0.0001105	0.000614	48.15	29.8	1.62	up
222863_at	ZBTB10	zinc finger and BTB domain containing 10	0.0001123	0.000623	30.04	18.18	1.65	up
232341_x_at	HABP4	hyaluronan binding protein 4	0.000114	0.000631	25.93	14.95	1.73	up
238797_at	TRIM11	tripartite motif-containing 11	0.0001143	0.000632	77.64	28.53	2.72	up
237180_at	PSME4	Proteasome (prosome, macropain) activator subunit 4	0.0001158	0.000639	209.02	110.88	1.89	up
213134_x_at	BTG3	BTG family, member 3	0.0001178	0.000647	19.17	11.42	1.68	up
242470_at	EID2B	EP300 interacting inhibitor of differentiation 2B	0.000119	0.000652	23.06	12.95	1.78	up
225024_at	RPRD1B	regulation of nuclear pre-mRNA domain containing 1B	0.0001208	0.00066	1064.29	318.31	3.34	up
233138_at	C18orf1	chromosome 18 open reading frame 1	0.0001221	0.000666	430.58	246.06	1.75	up
221840_at	PTPRE	protein tyrosine phosphatase, receptor type, E	0.0001244	0.000677	159.92	93.7	1.71	up
202875_s_at	PBX2	pre-B-cell leukemia homeobox 2	0.0001251	0.000679	27.51	10.83	2.54	up
222941_at	USP46	ubiquitin specific peptidase 46	0.0001289	0.000696	37.21	23.22	1.6	up
223476_s_at	C12orf65	chromosome 12 open reading frame 65	0.0001298	0.000699	378.46	230.3	1.64	up
1552711_a_at	CYB5D1	cytochrome b5 domain containing 1	0.0001298	0.000699	218.19	135.25	1.61	up
221631_at	CACNA1I	calcium channel, voltage-dependent, T type, alpha 1I subunit	0.0001318	0.000708	50.31	26.52	1.9	up
224734_at	HMGB1	high-mobility group box 1	0.0001328	0.000712	133.96	81.73	1.64	up
214077_x_at	MEIS3P1	Meis homeobox 3 pseudogene 1	0.0001338	0.000716	106.16	63.85	1.66	up
212472_at	MICAL2	microtubule associated monoxygenase, calponin and LIM domain containing 2	0.000135	0.000721	721.75	370.91	1.95	up
228075_x_at	TFB1M	transcription factor B1, mitochondrial	0.0001362	0.000726	120.66	71.48	1.69	up
225918_at	GLG1	golgi glycoprotein 1	0.0001378	0.000733	98.1	62.49	1.57	up
231970_at	C14orf118	Chromosome 14 open reading frame 118	0.0001387	0.000736	36.2	22.12	1.64	up
201728_s_at	KIAA0100	KIAA0100	0.0001385	0.000736	27.26	11.7	2.33	up
226010_at	SLC25A23	solute carrier family 25 (mitochondrial carrier; phosphate carrier), member 23	0.0001417	0.000751	89.68	44.56	2.01	up
231777_at	CSNK2B	casein kinase 2, beta polypeptide	0.0001435	0.00076	412.86	105.91	3.9	up
217414_x_at	HBA1	hemoglobin, alpha 1	0.0001439	0.000761	242.75	137.86	1.76	up
1558486_at	ZNF493	zinc finger protein 493	0.0001443	0.000762	203.84	121.35	1.68	up
240336_at	HBM	hemoglobin, mu	0.0001454	0.000766	29.76	13.87	2.15	up
224673_at	LENG8	leukocyte receptor cluster (LRC) member 8	0.0001454	0.000766	495.03	113.31	4.37	up
212007_at	UBXN4	UBX domain protein 4	0.0001458	0.000768	157.66	64.44	2.45	up
1554309_at	EIF4G3	eukaryotic translation initiation factor 4 gamma, 3	0.0001521	0.000797	21.87	12.48	1.75	up
1558896_at	C1orf69	chromosome 1 open reading frame 69	0.0001583	0.000825	39.83	14.55	2.74	up
214073_at	CTTN	cortactin	0.0001593	0.000828	167.45	97.76	1.71	up
238695_s_at	RAB39B	RAB39B, member RAS oncogene family	0.0001596	0.000828	90.38	47.27	1.91	up
214746_s_at	ZNF467	zinc finger protein 467	0.0001595	0.000828	123.08	71.84	1.71	up
212089_at	LMNA	lamin A/C	0.0001642	0.000847	36.37	21.51	1.69	up
1552978_a_at	SCAMP1	secretory carrier membrane protein 1	0.0001641	0.000847	78.81	33.8	2.33	up
230629_s_at	EP400	E1A binding protein p400	0.000165	0.00085	125.12	55.71	2.25	up
235124_at	LOC645212	hypothetical LOC645212	0.0001726	0.000881	178.3	101.66	1.75	up
203141_s_at	AP3B1	adaptor-related protein complex 3, beta 1 subunit	0.0001785	0.000908	116.06	46.67	2.49	up
212297_at	ATP13A3	ATPase type 13A3	0.0001792	0.000911	16.71	10	1.67	up
211991_s_at	HLA-DPA1	major histocompatibility complex, class II, DP alpha 1	0.0001819	0.000921	41.35	26.35	1.57	up
224618_at	ROD1	ROD1 regulator of differentiation 1 (S. pombe)	0.0001851	0.000935	166.65	68.81	2.42	up
226805_at	FITM2	fat storage-inducing transmembrane protein 2	0.0001857	0.000936	28.66	14.82	1.93	up
238523_at	KLHL36	kelch-like 36 (Drosophila)	0.0001856	0.000936	148.08	82.67	1.79	up
238458_at	EFHA2	EF-hand domain family, member A2	0.0001865	0.00094	47.35	28.45	1.66	up
238430_x_at	SLFN5	schlafen family member 5	0.0001897	0.000953	336.12	211.49	1.59	up
228157_at	ZNF207	zinc finger protein 207	0.0001915	0.000961	335.27	181.22	1.85	up
224616_at	DYNC1LI2	dynein, cytoplasmic 1, light intermediate chain 2	0.0001932	0.000968	67.46	19.41	3.48	up
228239_at	FAM165B	family with sequence similarity 165, member B	0.000195	0.000976	349.21	186.26	1.87	up
226475_at	FAM118A	family with sequence similarity 118, member A	0.0001962	0.000981	44.98	20.88	2.15	up
212487_at	GPATCH8	G patch domain containing 8	0.0001999	0.000998	152.24	67.07	2.27	up
242706_s_at	MED23	mediator complex subunit 23	0.0002007	0.001	643.22	145.21	4.43	up
228606_at	TCTEX1D2	Tctex1 domain containing 2	0.0002029	0.00101	444.85	221.02	2.01	up
239272_at	MMP28	matrix metallopeptidase 28	0.0002044	0.00102	24.34	12.48	1.95	up
244043_at	TFDP2	transcription factor Dp-2 (E2F dimerization partner 2)	0.0002077	0.00103	47.63	20.08	2.37	up
230469_at	RTKN2	rhotekin 2	0.0002087	0.00104	76.49	45.42	1.68	up
222444_at	ARMCX3	armadillo repeat containing, X-linked 3	0.000216	0.00107	611.68	195.39	3.13	up
215133_s_at	FAM153A	family with sequence similarity 153, member A	0.0002203	0.00108	85.75	52.06	1.65	up
225096_at	C17orf79	chromosome 17 open reading frame 79	0.0002299	0.00113	141.32	80.07	1.76	up
214729_at	TWISTNB	TWIST neighbor	0.0002331	0.00114	41.31	23.07	1.79	up
203906_at	IQSEC1	IQ motif and Sec7 domain 1	0.0002386	0.00117	85.78	30.51	2.81	up
213532_at	ADAM17	ADAM metallopeptidase domain 17	0.0002415	0.00118	64.25	38.87	1.65	up
1555962_at	B3GNT7	UDP-GlcNAc:betaGal beta-1,3-N-acetylglucosaminyltransferase 7	0.0002422	0.00118	35.56	18.14	1.96	up
1555372_at	BCL2L11	BCL2-like 11 (apoptosis facilitator)	0.0002415	0.00118	285.64	170.29	1.68	up
226188_at	HSPC159	galectin-related protein	0.0002424	0.00118	426.59	263.87	1.62	up
226528_at	MTX3	metaxin 3	0.0002413	0.00118	36.26	21.21	1.71	up
229389_at	ATG16L2	ATG16 autophagy related 16-like 2 (S. cerevisiae)	0.0002461	0.00119	106.06	54.51	1.95	up
235328_at	PLXNC1	Plexin C1	0.0002469	0.00119	27.01	15.08	1.79	up
230380_at	LOC100289049	Hypothetical protein LOC100289049	0.0002478	0.0012	157.92	90.68	1.74	up
1559039_at	DHX36	DEAH (Asp-Glu-Ala-His) box polypeptide 36	0.000254	0.00122	83.9	46.73	1.8	up
1569003_at	TMEM49	transmembrane protein 49	0.000261	0.00125	214.28	134.79	1.59	up
242176_at	MEF2A	Myocyte enhancer factor 2A	0.0002631	0.00126	291.39	144.47	2.02	up
201660_at	ACSL3	Acyl-CoA synthetase long-chain family member 3	0.0002668	0.00128	30.92	17.52	1.76	up
225821_s_at	BOD1L	biorientation of chromosomes in cell division 1-like	0.0002721	0.00129	177.22	58.42	3.03	up
225703_at	FBRSL1	fibrosin-like 1	0.0002722	0.00129	63.32	21.62	2.93	up
226975_at	RNPC3	RNA-binding region (RNP1, RRM) containing 3	0.0002697	0.00129	37.57	24.63	1.53	up
226169_at	SBF2	SET binding factor 2	0.0002719	0.00129	39.33	21.86	1.8	up
230748_at	SLC16A6	solute carrier family 16, member 6 (monocarboxylic acid transporter 7)	0.0002698	0.00129	144.74	76.62	1.89	up
1558075_at	LOC339047	Hypothetical protein LOC339047	0.0002748	0.0013	31.01	16.3	1.9	up
213517_at	PCBP2	poly(rC) binding protein 2	0.0002739	0.0013	379.35	250.32	1.52	up
225979_at	PLEKHG2	pleckstrin homology domain containing, family G (with RhoGef domain) member 2	0.0002733	0.0013	29.88	17.62	1.7	up
232549_at	RBM11	RNA binding motif protein 11	0.0002731	0.0013	79.04	46.72	1.69	up
222126_at	AGFG2	ArfGAP with FG repeats 2	0.0002831	0.00133	37.71	21.2	1.78	up
231798_at	NOG	noggin	0.0002813	0.00133	104.98	64.64	1.62	up
226364_at	HIP1	Huntingtin interacting protein 1	0.000294	0.00138	105.58	59.75	1.77	up
230788_at	GCNT2	glucosaminyl (N-acetyl) transferase 2, I-branching enzyme (I blood group)	0.0002965	0.00139	63.47	29.83	2.13	up
209254_at	KLHDC10	kelch domain containing 10	0.0002975	0.00139	87.39	36.18	2.42	up
213152_s_at	SFRS2B	splicing factor, arginine/serine-rich 2B	0.0003023	0.00141	43.12	25.98	1.66	up
1557948_at	PHLDB3	pleckstrin homology-like domain, family B, member 3	0.0003085	0.00143	83.53	49.35	1.69	up
237367_x_at	CFLAR	CASP8 and FADD-like apoptosis regulator	0.0003103	0.00144	42.57	22.44	1.9	up
222449_at	PMEPA1	prostate transmembrane protein, androgen induced 1	0.0003142	0.00145	28.19	13.85	2.03	up
224563_at	WASF2	WAS protein family, member 2	0.000313	0.00145	178.04	80.93	2.2	up
239647_at	CHST13	carbohydrate (chondroitin 4) sulfotransferase 13	0.000316	0.00146	511.27	316.54	1.62	up
213056_at	FRMD4B	FERM domain containing 4B	0.0003203	0.00148	192.1	108.62	1.77	up
235780_at	PRKACB	protein kinase, cAMP-dependent, catalytic, beta	0.0003208	0.00148	31.97	21.11	1.51	up
212420_at	ELF1	E74-like factor 1 (ets domain transcription factor)	0.0003227	0.00149	38.53	17.29	2.23	up
244235_at	IVNS1ABP	influenza virus NS1A binding protein	0.0003246	0.00149	67.49	39.3	1.72	up
215859_at	NCLN	nicalin homolog (zebrafish)	0.0003245	0.00149	66.4	40.88	1.62	up
238692_at	BTBD11	BTB (POZ) domain containing 11	0.0003269	0.0015	71.76	36.57	1.96	up
222483_at	EFHD2	EF-hand domain family, member D2	0.000332	0.00152	81.2	43.45	1.87	up
223519_at	ZAK	sterile alpha motif and leucine zipper containing kinase AZK	0.0003364	0.00154	75.25	43.24	1.74	up
228647_at	LOC100049716	hypothetical protein LOC100049716	0.0003421	0.00156	28.94	15.3	1.89	up
214228_x_at	TNFRSF4	tumor necrosis factor receptor superfamily, member 4	0.0003423	0.00156	155.46	82.76	1.88	up
228193_s_at	C13orf15	Chromosome 13 open reading frame 15	0.0003477	0.00158	80.84	46.06	1.76	up
241535_at	LOC100292909	hypothetical protein LOC100292909	0.0003508	0.00159	21.42	12.67	1.69	up
212423_at	ZCCHC24	zinc finger, CCHC domain containing 24	0.0003496	0.00159	176.37	110.32	1.6	up
215201_at	REPS1	RALBP1 associated Eps domain containing 1	0.0003547	0.0016	488.24	278.45	1.75	up
213275_x_at	CTSB	cathepsin B	0.0003581	0.00161	74.2	41.57	1.79	up
229060_at	YPEL2	yippee-like 2 (Drosophila)	0.000358	0.00161	118.66	53.93	2.2	up
232612_s_at	ATG16L1	ATG16 autophagy related 16-like 1 (S. cerevisiae)	0.0003599	0.00162	283.09	175.27	1.62	up
234982_at	UBR3	ubiquitin protein ligase E3 component n-recognin 3 (putative)	0.0003599	0.00162	51.38	16.91	3.04	up
241985_at	JMY	junction mediating and regulatory protein, p53 cofactor	0.0003624	0.00163	308.22	167.72	1.84	up
1559190_s_at	RDH13	retinol dehydrogenase 13 (all-trans/9-cis)	0.0003615	0.00163	136.94	82.84	1.65	up
208710_s_at	AP3D1	adaptor-related protein complex 3, delta 1 subunit	0.0003853	0.00172	401.34	158.37	2.53	up
224685_at	MLLT4	myeloid/lymphoid or mixed-lineage leukemia (trithorax homolog, Drosophila); translocated to, 4	0.0004017	0.00179	38.32	24.79	1.55	up
215040_at	RNASEH2B	Ribonuclease H2, subunit B	0.0004064	0.0018	92.13	57.06	1.61	up
212994_at	THOC2	THO complex 2	0.0004219	0.00186	143	54.51	2.62	up
227410_at	FAM43A	family with sequence similarity 43, member A	0.0004241	0.00187	102.54	48.59	2.11	up
213272_s_at	TMEM159	transmembrane protein 159	0.0004278	0.00188	122.42	50.82	2.41	up
214982_at	SNRNP200	small nuclear ribonucleoprotein 200kDa (U5)	0.000435	0.00191	373.99	226.32	1.65	up
232483_at	MED17	mediator complex subunit 17	0.000446	0.00195	21.9	13.15	1.67	up
217232_x_at	HBB	hemoglobin, beta	0.0004597	0.002	55.56	31.4	1.77	up
225661_at	IFNAR1	interferon (alpha, beta and omega) receptor 1	0.0004589	0.002	122.52	56.85	2.16	up
1552691_at	ARL11	ADP-ribosylation factor-like 11	0.0004658	0.00202	32.12	20.14	1.6	up
203833_s_at	TGOLN2	trans-golgi network protein 2	0.0004648	0.00202	1163.23	491.18	2.37	up
44790_s_at	C13orf18	chromosome 13 open reading frame 18	0.000469	0.00204	133.72	81.41	1.64	up
227769_at	GPR27	G protein-coupled receptor 27	0.0004765	0.00207	69.2	31.9	2.17	up
225332_at	LOC729082	Hypothetical protein LOC729082	0.0004946	0.00213	142.34	91.11	1.56	up
222387_s_at	VPS35	vacuolar protein sorting 35 homolog (S. cerevisiae)	0.0004945	0.00213	108.74	49.41	2.2	up
229713_at	PIP4K2A	Phosphatidylinositol-5-phosphate 4-kinase, type II, alpha	0.0005052	0.00217	83.28	54.18	1.54	up
230516_at	C7orf30	Chromosome 7 open reading frame 30	0.0005097	0.00218	34.34	20.32	1.69	up
1553304_at	LSM14B	LSM14B, SCD6 homolog B (S. cerevisiae)	0.0005114	0.00219	290.72	113.98	2.55	up
217371_s_at	IL15	interleukin 15	0.0005148	0.0022	66.77	30.7	2.18	up
231909_x_at	ODF2L	outer dense fiber of sperm tails 2-like	0.0005288	0.00225	111.28	61.68	1.8	up
235086_at	THBS1	thrombospondin 1	0.0005306	0.00225	59.5	33.07	1.8	up
236160_at	TRIP11	thyroid hormone receptor interactor 11	0.0005499	0.00232	198.06	127.82	1.55	up
1559139_at	NOC2L	nucleolar complex associated 2 homolog (S. cerevisiae)	0.0005512	0.00233	238.15	86.07	2.77	up
234411_x_at	CD44	CD44 molecule (Indian blood group)	0.0005604	0.00236	157.33	92.61	1.7	up
226059_at	TOMM40L	translocase of outer mitochondrial membrane 40 homolog (yeast)-like	0.00232388	0.00236408	236.06	121.92	1.94	up
1553743_at	FAM119A	family with sequence similarity 119, member A	0.0005644	0.00237	54.65	29.15	1.87	up
238057_at	USP45	ubiquitin specific peptidase 45	0.0005796	0.00242	89.82	54.45	1.65	up
224719_s_at	C12orf57	chromosome 12 open reading frame 57	0.0005819	0.00243	242.71	151.47	1.6	up
212099_at	RHOB	ras homolog gene family, member B	0.0005944	0.00247	130.97	81.1	1.61	up
226850_at	SUMF1	sulfatase modifying factor 1	0.0005937	0.00247	131.72	80.18	1.64	up
212820_at	DMXL2	Dmx-like 2	0.0005989	0.00249	28.89	18.13	1.59	up
1554132_a_at	FAM190B	family with sequence similarity 190, member B	0.0006033	0.00251	193.52	99.73	1.94	up
1568964_x_at	SPN	sialophorin	0.0006133	0.00254	33.59	14.84	2.26	up
215434_x_at	LOC100288142	neuroblastoma breakpoint family member	0.0006227	0.00257	145.64	60.49	2.41	up
233827_s_at	SUPT16H	suppressor of Ty 16 homolog (S. cerevisiae)	0.0006213	0.00257	776.92	319.93	2.43	up
1556389_at	CNPY3	canopy 3 homolog (zebrafish)	0.0006256	0.00258	42.99	17.92	2.4	up
214705_at	INADL	InaD-like (Drosophila)	0.0006316	0.00261	24.57	11.41	2.15	up
235980_at	PIK3CA	Phosphoinositide-3-kinase, catalytic, alpha polypeptide	0.0006409	0.00264	401.26	235.77	1.7	up
215299_x_at	SULT1A1	sulfotransferase family, cytosolic, 1A, phenol-preferring, member 1	0.0006664	0.00272	36.86	20.27	1.82	up
228058_at	ZG16B	zymogen granule protein 16 homolog B (rat)	0.0006731	0.00274	38.36	24.25	1.58	up
1552274_at	PXK	PX domain containing serine/threonine kinase	0.000676	0.00275	96.46	42.17	2.29	up
1552806_a_at	SIGLEC10	sialic acid binding Ig-like lectin 10	0.0006809	0.00277	41.19	25.68	1.6	up
232063_x_at	FARSB	phenylalanyl-tRNA synthetase, beta subunit	0.0006876	0.00279	321.67	168.16	1.91	up
203086_at	KIF2A	kinesin heavy chain member 2A	0.000694	0.00281	77.03	40.23	1.91	up
214722_at	NOTCH2NL	Notch homolog 2 (Drosophila) N-terminal like	0.0006933	0.00281	35.32	18.21	1.94	up
1554614_a_at	PTBP2	polypyrimidine tract binding protein 2	0.0006983	0.00282	81.76	50.84	1.61	up
239413_at	CEP152	centrosomal protein 152kDa	0.0007074	0.00286	59.44	17.99	3.3	up
229597_s_at	WDFY4	WDFY family member 4	0.0007092	0.00286	84.66	45.18	1.87	up
231530_s_at	C11orf1	chromosome 11 open reading frame 1	0.0007229	0.0029	44.26	26.52	1.67	up
232171_x_at	LOC100129637	hypothetical LOC100129637	0.0007229	0.0029	23.21	12.85	1.81	up
209088_s_at	UBN1	ubinuclein 1	0.0007404	0.00296	29.43	12.29	2.39	up
225521_at	ANAPC7	anaphase promoting complex subunit 7	0.0007669	0.00305	243.72	131.41	1.85	up
226482_s_at	TSTD1	thiosulfate sulfurtransferase (rhodanese)-like domain containing 1	0.0007697	0.00306	59.32	31.71	1.87	up
1569225_a_at	SCML4	sex comb on midleg-like 4 (Drosophila)	0.0007751	0.00307	98.67	56.64	1.74	up
242550_at	EIF3B	eukaryotic translation initiation factor 3, subunit B	0.0007831	0.0031	50.91	32.99	1.54	up
1555883_s_at	SPIN3	spindlin family, member 3	0.0008075	0.00318	104.04	51.26	2.03	up
214102_at	ARAP2	ArfGAP with RhoGAP domain, ankyrin repeat and PH domain 2	0.0008157	0.00321	26.27	14.15	1.86	up
1559034_at	SIRPB2	signal-regulatory protein beta 2	0.0008316	0.00326	100.35	47.47	2.11	up
240573_at	LOC374443	CLR pseudogene	0.0008379	0.00328	26.46	16.6	1.59	up
212460_at	C14orf147	chromosome 14 open reading frame 147	0.0008452	0.0033	143.45	85.35	1.68	up
214012_at	ERAP1	endoplasmic reticulum aminopeptidase 1	0.0008457	0.0033	154	71.01	2.17	up
215231_at	PRKAG2	Protein kinase, AMP-activated, gamma 2 non-catalytic subunit	0.0008461	0.0033	258.24	141.71	1.82	up
226087_at	LZIC	leucine zipper and CTNNBIP1 domain containing	0.0008523	0.00332	1299.28	478.69	2.71	up
213533_at	D4S234E	DNA segment on chromosome 4 (unique) 234 expressed sequence	0.0008637	0.00336	189.86	117.39	1.62	up
225315_at	MRPL21	mitochondrial ribosomal protein L21	0.0008683	0.00337	148.7	53.93	2.76	up
201085_s_at	SON	SON DNA binding protein	0.0008813	0.00341	122.46	53.11	2.31	up
235885_at	P2RY12	purinergic receptor P2Y, G-protein coupled, 12	0.0008955	0.00347	37.65	21.9	1.72	up
214755_at	UAP1L1	UDP-N-acteylglucosamine pyrophosphorylase 1-like 1	0.000895	0.00347	57.87	32.76	1.77	up
204160_s_at	ENPP4	ectonucleotide pyrophosphatase/phosphodiesterase 4 (putative function)	0.0009304	0.00357	31.61	16.74	1.89	up
227673_at	ZNRD1	zinc ribbon domain containing 1	0.0009362	0.00359	276.17	172.97	1.6	up
244654_at	MYO1G	myosin IG	0.0009394	0.0036	53.51	33.05	1.62	up
203810_at	DNAJB4	DnaJ (Hsp40) homolog, subfamily B, member 4	0.0009566	0.00365	610.61	337.97	1.81	up
223504_at	DNAJC27	DnaJ (Hsp40) homolog, subfamily C, member 27	0.0009616	0.00366	58.02	29.4	1.97	up
1554671_a_at	SRRM2	serine/arginine repetitive matrix 2	0.0009608	0.00366	80.83	46.12	1.75	up
202844_s_at	RALBP1	ralA binding protein 1	0.0009691	0.00369	80.11	35.64	2.25	up
202082_s_at	SEC14L1	SEC14-like 1 (S. cerevisiae)	0.0009718	0.00369	82.47	35.41	2.33	up
201056_at	GOLGB1	golgin B1	0.0009805	0.00372	72.26	22.57	3.2	up
216676_x_at	KIR3DL3	killer cell immunoglobulin-like receptor, three domains, long cytoplasmic tail, 3	0.0009926	0.00376	42.55	20.57	2.07	up
230505_at	LOC145474	hypothetical protein LOC145474	0.0009971	0.00377	89.54	55.63	1.61	up
228201_at	ARL13B	ADP-ribosylation factor-like 13B	0.0009996	0.00378	32.25	16.57	1.95	up
213002_at	MARCKS	myristoylated alanine-rich protein kinase C substrate	0.0010117	0.00381	33.43	18.72	1.79	up
203817_at	GUCY1B3	guanylate cyclase 1, soluble, beta 3	0.0010399	0.0039	46.35	26.17	1.77	up
222706_at	CWC25	CWC25 spliceosome-associated protein homolog (S. cerevisiae)	0.00106	0.00396	268.91	170.46	1.58	up
227606_s_at	STAMBPL1	STAM binding protein-like 1	0.0010651	0.00398	27.74	16.44	1.69	up
243492_at	THEM4	thioesterase superfamily member 4	0.0010794	0.00403	156.98	91.71	1.71	up
222264_at	HNRNPUL2	heterogeneous nuclear ribonucleoprotein U-like 2	0.0010846	0.00404	33.49	14.35	2.33	up
243362_s_at	LOC641518	hypothetical LOC641518	0.0010861	0.00404	39.7	22.78	1.74	up
204593_s_at	SMCR7L	Smith-Magenis syndrome chromosome region, candidate 7-like	0.0011009	0.00409	210.57	123.4	1.71	up
1553048_a_at	PIP4K2B	phosphatidylinositol-5-phosphate 4-kinase, type II, beta	0.0011119	0.00412	112.15	45.37	2.47	up
228950_s_at	WLS	wntless homolog (Drosophila)	0.00111	0.00412	37.73	17.38	2.17	up
209750_at	NR1D2	nuclear receptor subfamily 1, group D, member 2	0.0011221	0.00415	36.83	22.5	1.64	up
213235_at	C16orf88	chromosome 16 open reading frame 88	0.0011248	0.00416	32.33	13.02	2.48	up
236128_at	ZNF91	zinc finger protein 91	0.0011281	0.00417	47.66	28.32	1.68	up
235276_at	EPSTI1	epithelial stromal interaction 1 (breast)	0.0011315	0.00418	50.66	23.3	2.17	up
227442_at	COX18	COX18 cytochrome c oxidase assembly homolog (S. cerevisiae)	0.001142	0.00421	170.96	92.63	1.85	up
215358_x_at	ZNF37B	zinc finger protein 37B (pseudogene)	0.0011428	0.00421	64.56	34.92	1.85	up
1558732_at	MAP4K4	mitogen-activated protein kinase kinase kinase kinase 4	0.0011561	0.00425	16.64	10.08	1.65	up
233937_at	GGNBP2	gametogenetin binding protein 2	0.0011598	0.00426	164.2	97.8	1.68	up
1552986_at	LOC142937	hypothetical protein BC008131	0.0011741	0.00431	376.23	245.53	1.53	up
1554638_at	ZFYVE16	zinc finger, FYVE domain containing 16	0.0011735	0.00431	31.8	14.82	2.15	up
225508_at	KIAA1468	KIAA1468	0.0011941	0.00437	45.8	16.53	2.77	up
212647_at	RRAS	related RAS viral (r-ras) oncogene homolog	0.0012207	0.00445	22.13	13.06	1.69	up
1552410_at	CLEC4F	C-type lectin domain family 4, member F	0.0012264	0.00447	450.05	242.87	1.85	up
227842_at	RAB30	RAB30, member RAS oncogene family	0.0012528	0.00454	90.59	59.72	1.52	up
225297_at	HAUS1	HAUS augmin-like complex, subunit 1	0.0012725	0.0046	44.98	16.61	2.71	up
1570432_at	LOC100133287	hypothetical protein LOC100133287	0.0013015	0.00469	60.5	31.49	1.92	up
221748_s_at	TNS1	tensin 1	0.0013373	0.00481	190.26	124.55	1.53	up
1557227_s_at	TPR	translocated promoter region (to activated MET oncogene)	0.0013412	0.00482	59.96	25.65	2.34	up
225551_at	CNST	consortin, connexin sorting protein	0.0013485	0.00484	71.55	46.98	1.52	up
235222_x_at	XIAP	X-linked inhibitor of apoptosis	0.0013464	0.00484	1076.66	402	2.68	up
222611_s_at	PSPC1	paraspeckle component 1	0.0013539	0.00485	50.16	26.42	1.9	up
212813_at	JAM3	junctional adhesion molecule 3	0.0013605	0.00487	72.62	48.19	1.51	up
212453_at	KIAA1279	KIAA1279	0.0013581	0.00487	120.94	78.78	1.54	up
232885_at	NCRNA00081	non-protein coding RNA 81	0.0013763	0.00491	20.42	12.71	1.61	up
226065_at	PRICKLE1	prickle homolog 1 (Drosophila)	0.0013768	0.00491	55.82	32.36	1.73	up
228370_at	SNRPN	small nuclear ribonucleoprotein polypeptide N	0.0014014	0.00499	578.68	309.91	1.87	up
1558675_s_at	SDCCAG1	serologically defined colon cancer antigen 1	0.0014188	0.00504	124.59	35.6	3.5	up
236431_at	SR140	U2-associated SR140 protein	0.0014292	0.00507	77.47	43.11	1.8	up
215501_s_at	DUSP10	dual specificity phosphatase 10	0.0014439	0.00512	76.77	43.81	1.75	up
234968_at	DENND4C	DENN/MADD domain containing 4C	0.0014605	0.00516	43.51	28.49	1.53	up
215239_x_at	ZNF273	zinc finger protein 273	0.0014583	0.00516	133.89	76.34	1.75	up
1556567_at	NAP1L4	nucleosome assembly protein 1-like 4	0.0014751	0.0052	44	25.35	1.74	up
229170_s_at	TTC18	tetratricopeptide repeat domain 18	0.0014735	0.0052	21.51	11.82	1.82	up
226983_at	ZNF777	zinc finger protein 777	0.0014782	0.00521	78.11	47.83	1.63	up
215429_s_at	ZNF428	zinc finger protein 428	0.0015125	0.00532	306.24	131.52	2.33	up
213799_s_at	PTPRA	protein tyrosine phosphatase, receptor type, A	0.0015362	0.00538	444.84	185.05	2.4	up
208930_s_at	ILF3	interleukin enhancer binding factor 3, 90kDa	0.001555	0.00544	35.75	14.74	2.43	up
208963_x_at	FADS1	fatty acid desaturase 1	0.0015691	0.00548	133.86	83.93	1.59	up
227726_at	RNF166	ring finger protein 166	0.0015994	0.00555	81.16	53.75	1.51	up
212002_at	C1orf144	chromosome 1 open reading frame 144	0.0016262	0.00563	413.8	177.82	2.33	up
234970_at	TC2N	tandem C2 domains, nuclear	0.0016582	0.00572	62.82	34.89	1.8	up
235296_at	EIF5A2	eukaryotic translation initiation factor 5A2	0.0017028	0.00584	20.66	11.46	1.8	up
241275_at	CAPZA1	Capping protein (actin filament) muscle Z-line, alpha 1	0.0017081	0.00585	22.5	13.92	1.62	up
202007_at	NID1	nidogen 1	0.0017469	0.00594	71.48	44.03	1.62	up
226068_at	SYK	spleen tyrosine kinase	0.0017571	0.00596	50.61	26.31	1.92	up
214721_x_at	CDC42EP4	CDC42 effector protein (Rho GTPase binding) 4	0.0017642	0.00598	17.6	10.55	1.67	up
215489_x_at	HOMER3	homer homolog 3 (Drosophila)	0.001816	0.00613	60.87	37.85	1.61	up
1559585_at	DDX60L	DEAD (Asp-Glu-Ala-Asp) box polypeptide 60-like	0.0018458	0.00621	546.74	288.28	1.9	up
214911_s_at	BRD2	bromodomain containing 2	0.0018726	0.0063	85.71	32.3	2.65	up
1553043_a_at	CD300LF	CD300 molecule-like family member f	0.0019268	0.00646	85.2	52.13	1.63	up
224995_at	SPIRE1	spire homolog 1 (Drosophila)	0.0019312	0.00647	42.79	20.7	2.07	up
212171_x_at	VEGFA	vascular endothelial growth factor A	0.0019522	0.00652	483.04	300.89	1.61	up
225066_at	PPP2R2D	protein phosphatase 2, regulatory subunit B, delta isoform	0.0019883	0.00662	48.42	26.79	1.81	up
244871_s_at	USP32	ubiquitin specific peptidase 32	0.0020141	0.0067	76.18	45	1.69	up
235610_at	ALKBH8	alkB, alkylation repair homolog 8 (E. coli)	0.0020466	0.0068	226.66	110.08	2.06	up
237426_at	SP100	SP100 nuclear antigen	0.0020597	0.00683	62.21	32.65	1.91	up
1555950_a_at	CD55	CD55 molecule, decay accelerating factor for complement (Cromer blood group)	0.0020682	0.00685	61.82	35.06	1.76	up
214626_s_at	GANAB	glucosidase, alpha; neutral AB	0.0020956	0.00692	149.28	55.72	2.68	up
200615_s_at	AP2B1	adaptor-related protein complex 2, beta 1 subunit	0.0021524	0.00709	74.46	47.79	1.56	up
225280_x_at	ARSD	arylsulfatase D	0.0022361	0.00734	270.6	158.18	1.71	up
221595_at	C7orf64	chromosome 7 open reading frame 64	0.00226	0.00741	240.06	154.54	1.55	up
201635_s_at	FXR1	fragile X mental retardation, autosomal homolog 1	0.0023048	0.00753	88.35	37.07	2.38	up
223197_s_at	SMARCAD1	SWI/SNF-related, matrix-associated actin-dependent regulator of chromatin, subfamily a, containing DEAD/H box 1	0.0023362	0.00762	40.55	19.01	2.13	up
230571_at	LOC100289086	hypothetical protein LOC100289086	0.0023743	0.00772	42.03	27.49	1.53	up
214551_s_at	CD7	CD7 molecule	0.0024366	0.0079	20.1	11.22	1.79	up
225782_at	MSRB3	methionine sulfoxide reductase B3	0.0024404	0.0079	69.97	36.25	1.93	up
215342_s_at	RABGAP1L	RAB GTPase activating protein 1-like	0.00792285	0.00800453	71.46	41.1	1.74	up
233013_x_at	LOC220906	hypothetical protein LOC220906	0.0025367	0.00818	937.19	341.66	2.74	up
238853_at	RAB3IP	RAB3A interacting protein (rabin3)	0.0026183	0.00841	66.17	34.54	1.92	up
228498_at	B4GALT1	UDP-Gal:betaGlcNAc beta 1,4- galactosyltransferase, polypeptide 1	0.002645	0.00848	91.8	42.9	2.14	up
222439_s_at	THRAP3	thyroid hormone receptor associated protein 3	0.0026434	0.00848	106.09	45.14	2.35	up
229967_at	CMTM2	CKLF-like MARVEL transmembrane domain containing 2	0.0026587	0.00851	146.99	80.54	1.83	up
204131_s_at	FOXO3	forkhead box O3	0.0026752	0.00854	38.27	22.99	1.66	up
242776_at	ZCCHC6	zinc finger, CCHC domain containing 6	0.0026737	0.00854	50.55	25.66	1.97	up
225509_at	SAP30L	SAP30-like	0.0026942	0.00859	62.89	40.46	1.55	up
216263_s_at	NGDN	neuroguidin, EIF4E binding protein	0.0027131	0.00864	65.54	38.08	1.72	up
228667_at	AGPAT4	1-acylglycerol-3-phosphate O-acyltransferase 4 (lysophosphatidic acid acyltransferase, delta)	0.0027294	0.00869	24.13	15.39	1.57	up
222687_s_at	ACER3	alkaline ceramidase 3	0.0027533	0.00875	66.93	38.64	1.73	up
228774_at	CEP78	centrosomal protein 78kDa	0.0027758	0.0088	89.81	57.12	1.57	up
224877_s_at	MRPS5	mitochondrial ribosomal protein S5	0.0027837	0.00882	58.28	21.58	2.7	up
216804_s_at	PDLIM5	PDZ and LIM domain 5	0.0027919	0.00884	185.05	106.03	1.75	up
222895_s_at	BCL11B	B-cell CLL/lymphoma 11B (zinc finger protein)	0.0028213	0.00891	18.69	10.23	1.83	up
235231_at	ZNF789	zinc finger protein 789	0.0028358	0.00895	193.11	104.96	1.84	up
239435_x_at	SHROOM1	shroom family member 1	0.0028785	0.00906	45.28	27.69	1.64	up
227945_at	TBC1D1	TBC1 (tre-2/USP6, BUB2, cdc16) domain family, member 1	0.002879	0.00906	65.52	36.8	1.78	up
1552398_a_at	CLEC12A	C-type lectin domain family 12, member A	0.0028989	0.00911	270.25	130.83	2.07	up
215071_s_at	HIST1H2AC	histone cluster 1, H2ac	0.0029235	0.00919	43.49	28.37	1.53	up
229723_at	TAGAP	T-cell activation RhoGTPase activating protein	0.0029294	0.0092	281.14	158.37	1.78	up
221989_at	RPL10	ribosomal protein L10	0.0029651	0.0093	569.61	152.37	3.74	up
232288_at	PDXDC1	pyridoxal-dependent decarboxylase domain containing 1	0.0029859	0.00936	118.69	78.52	1.51	up
227751_at	PDCD5	programmed cell death 5	0.0030158	0.00944	127.2	76.2	1.67	up
200984_s_at	CD59	CD59 molecule, complement regulatory protein	0.0030303	0.00946	59.61	39.02	1.53	up
232551_at	SLC26A6	solute carrier family 26, member 6	0.0030663	0.00957	47	27.61	1.7	up
228416_at	ACVR2A	activin A receptor, type IIA	0.0030769	0.00958	26	16.79	1.55	up
236850_at	CAPRIN1	Cell cycle associated protein 1	0.0030762	0.00958	24.85	13.56	1.83	up
226198_at	TOM1L2	target of myb1-like 2 (chicken)	0.0030874	0.00961	637.12	393.19	1.62	up
224836_at	TP53INP2	tumor protein p53 inducible nuclear protein 2	0.003163	0.00979	210.38	116.64	1.8	up
236140_at	GCLM	glutamate-cysteine ligase, modifier subunit	0.0032037	0.00989	45.7	26.57	1.72	up
217507_at	SLC11A1	solute carrier family 11 (proton-coupled divalent metal ion transporters), member 1	0.0032145	0.00991	25.63	15.71	1.63	up
1569827_at	ATG7	ATG7 autophagy related 7 homolog (S. cerevisiae)	0.0032266	0.00994	527.07	332.24	1.59	up
236316_at	FAM3C	family with sequence similarity 3, member C	0.003228	0.00994	340.48	224.97	1.51	up
230332_at	ZCCHC7	Zinc finger, CCHC domain containing 7	0.0032301	0.00994	61.8	33.27	1.86	up
212715_s_at	MICAL3	microtubule associated monoxygenase, calponin and LIM domain containing 3	0.0032639	0.01	145.73	92.19	1.58	up
225957_at	C5orf41	chromosome 5 open reading frame 41	0.0033151	0.0102	241.04	110.46	2.18	up
1555913_at	GON4L	gon-4-like (C. elegans)	0.0034211	0.0104	556.09	245.84	2.26	up
225439_at	NUDCD1	NudC domain containing 1	0.0033968	0.0104	17.9	10.21	1.75	up
232521_at	PCSK7	proprotein convertase subtilisin/kexin type 7	0.0035078	0.0106	37.8	19.43	1.95	up
1553681_a_at	PRF1	perforin 1 (pore forming protein)	0.0034919	0.0106	23.94	13.39	1.79	up
212451_at	SECISBP2L	SECIS binding protein 2-like	0.0035463	0.0107	33.58	17.74	1.89	up
203771_s_at	BLVRA	biliverdin reductase A	0.0035734	0.0108	231.23	145.1	1.59	up
201681_s_at	DLG5	discs, large homolog 5 (Drosophila)	0.0036258	0.0109	770	406.86	1.89	up
1568877_a_at	ACBD5	acyl-CoA binding domain containing 5	0.0036365	0.011	30.29	13.25	2.29	up
200835_s_at	MAP4	microtubule-associated protein 4	0.0036333	0.011	298.41	123.9	2.41	up
39729_at	PRDX2	peroxiredoxin 2	0.0037674	0.0113	110.99	59.46	1.87	up
211993_at	WNK1	WNK lysine deficient protein kinase 1	0.0038373	0.0115	210.47	95.09	2.21	up
229666_s_at	CSTF3	cleavage stimulation factor, 3' pre-RNA, subunit 3, 77kDa	0.0038992	0.0116	137.02	80.9	1.69	up
238127_at	FLJ41484	hypothetical LOC650669	0.0038853	0.0116	26.18	12.75	2.05	up
222290_at	OR2A20P	olfactory receptor, family 2, subfamily A, member 20 pseudogene	0.0038762	0.0116	23.16	11.53	2.01	up
222128_at	NSUN6	NOP2/Sun domain family, member 6	0.0039321	0.0117	886.98	583.09	1.52	up
231866_at	LNPEP	leucyl/cystinyl aminopeptidase	0.0039424	0.0118	314.15	199.06	1.58	up
213515_x_at	HBG1	hemoglobin, gamma A	0.0040319	0.012	392.4	251.4	1.56	up
226694_at	AKAP2	A kinase (PRKA) anchor protein 2	0.0040952	0.0122	26.13	17.09	1.53	up
217118_s_at	C22orf9	chromosome 22 open reading frame 9	0.0041343	0.0122	23.17	14.49	1.6	up
76897_s_at	FKBP15	FK506 binding protein 15, 133kDa	0.0040998	0.0122	41.35	20.4	2.03	up
1566403_at	SNORA68	small nucleolar RNA, H/ACA box 68	0.0041009	0.0122	36.91	24.13	1.53	up
233169_at	ZNF350	zinc finger protein 350	0.0041183	0.0122	63.22	37.94	1.67	up
235179_at	ZNF641	zinc finger protein 641	0.0040927	0.0122	230.26	102.36	2.25	up
229115_at	DYNC1H1	dynein, cytoplasmic 1, heavy chain 1	0.0042101	0.0124	116.51	51.45	2.26	up
1559307_s_at	RBL1	retinoblastoma-like 1 (p107)	0.0042462	0.0125	59.07	28.23	2.09	up
212764_at	ZEB1	zinc finger E-box binding homeobox 1	0.0042336	0.0125	132.84	72.69	1.83	up
222026_at	RBM3	RNA binding motif (RNP1, RRM) protein 3	0.0043088	0.0127	44.32	17.82	2.49	up
212898_at	KIAA0406	KIAA0406	0.0043624	0.0128	53.07	33.15	1.6	up
1558711_at	FAM13AOS	FAM13A opposite strand (non-protein coding)	0.0044396	0.013	165.64	49.55	3.34	up
222912_at	ARRB1	arrestin, beta 1	0.0045509	0.0133	182.16	91.89	1.98	up
1556209_at	CLEC2B	C-type lectin domain family 2, member B	0.0045875	0.0133	138.53	76.25	1.82	up
228287_at	ING5	inhibitor of growth family, member 5	0.0046518	0.0135	30.57	17.09	1.79	up
238066_at	RBP7	retinol binding protein 7, cellular	0.0046538	0.0135	704.13	423.97	1.66	up
208744_x_at	HSPH1	heat shock 105kDa/110kDa protein 1	0.0046972	0.0136	19.77	12.95	1.53	up
228170_at	OLIG1	oligodendrocyte transcription factor 1	0.004752	0.0137	17.56	10.34	1.7	up
227608_at	YY1AP1	YY1 associated protein 1	0.0047256	0.0137	78.59	32.8	2.4	up
238669_at	PTGS1	prostaglandin-endoperoxide synthase 1 (prostaglandin G/H synthase and cyclooxygenase)	0.0047989	0.0139	38.88	20.25	1.92	up
200917_s_at	SRPR	signal recognition particle receptor (docking protein)	0.0048553	0.014	64.42	26.74	2.41	up
225794_s_at	C22orf32	chromosome 22 open reading frame 32	0.0050604	0.0145	221.59	132.68	1.67	up
1556072_at	C22orf37	chromosome 22 open reading frame 37	0.0050753	0.0145	23.11	14.27	1.62	up
236492_at	PPP2R2A	protein phosphatase 2, regulatory subunit B, alpha	0.0145285	0.0145781	887.45	495.31	1.79	up
1558173_a_at	LUZP1	leucine zipper protein 1	0.0051358	0.0147	75.32	34.2	2.2	up
222584_at	MSTO1	misato homolog 1 (Drosophila)	0.0051455	0.0147	41.94	23.14	1.81	up
225563_at	PAN3	PAN3 poly(A) specific ribonuclease subunit homolog (S. cerevisiae)	0.0051586	0.0147	549.48	194.79	2.82	up
212830_at	MEGF9	multiple EGF-like-domains 9	0.0052212	0.0149	29.08	15.22	1.91	up
230245_s_at	LOC283663	hypothetical LOC283663	0.0053058	0.0151	28.21	15.11	1.87	up
225945_at	ZNF655	zinc finger protein 655	0.0053961	0.0153	4169.31	1204.66	3.46	up
1559532_at	C3orf71	chromosome 3 open reading frame 71	0.0054633	0.0154	95.67	58.04	1.65	up
229354_at	AHRR	aryl-hydrocarbon receptor repressor	0.0055448	0.0156	101.31	47.52	2.13	up
226204_at	C22orf29	chromosome 22 open reading frame 29	0.0055517	0.0157	119.78	63.52	1.89	up
239014_at	CCAR1	Cell division cycle and apoptosis regulator 1	0.0056676	0.0159	135.17	77.97	1.73	up
244523_at	MMD	monocyte to macrophage differentiation-associated	0.0159105	0.0159105	1426.11	664.23	2.15	up
228789_at	MTMR6	myotubularin related protein 6	0.0057407	0.0161	583.19	360.92	1.62	up
209041_s_at	UBE2G2	ubiquitin-conjugating enzyme E2G 2 (UBC7 homolog, yeast)	0.0057421	0.0161	49.77	21.09	2.36	up
227094_at	DHTKD1	dehydrogenase E1 and transketolase domain containing 1	0.0057704	0.0162	33.52	18.71	1.79	up
1554453_at	HNRPLL	heterogeneous nuclear ribonucleoprotein L-like	0.0058794	0.0164	16.58	10.89	1.52	up
228056_s_at	NAPSB	napsin B aspartic peptidase pseudogene	0.0059869	0.0167	24.42	14.92	1.64	up
229452_at	TMEM88	transmembrane protein 88	0.0060119	0.0167	25.35	16.11	1.57	up
1558924_s_at	CLIP1	CAP-GLY domain containing linker protein 1	0.0061235	0.017	346.98	157.94	2.2	up
213908_at	WHAMML1	WAS protein homolog associated with actin, golgi membranes and microtubules-like 1	0.00611	0.017	86.26	46.8	1.84	up
1554821_a_at	ZBED1	zinc finger, BED-type containing 1	0.006165	0.0171	86.9	36.07	2.41	up
224797_at	ARRDC3	arrestin domain containing 3	0.0062105	0.0172	44.39	29.21	1.52	up
228351_at	HEATR1	HEAT repeat containing 1	0.0062841	0.0174	84.86	28.93	2.93	up
228937_at	C13orf31	chromosome 13 open reading frame 31	0.0063688	0.0175	24.41	14.46	1.69	up
214020_x_at	ITGB5	Integrin, beta 5	0.0064476	0.0177	38.57	20.27	1.9	up
235587_at	LOC202781	hypothetical LOC202781	0.0065664	0.018	69.17	39.76	1.74	up
221800_s_at	C17orf70	chromosome 17 open reading frame 70	0.0066213	0.0181	77.73	30.12	2.58	up
216197_at	ATF7IP	activating transcription factor 7 interacting protein	0.0067923	0.0185	443.77	255.28	1.74	up
229899_s_at	C20orf199	chromosome 20 open reading frame 199	0.0067974	0.0185	542.97	108.44	5.01	up
222088_s_at	SLC2A14	solute carrier family 2 (facilitated glucose transporter), member 14	0.0069924	0.019	82.68	45.31	1.82	up
212743_at	RCHY1	ring finger and CHY zinc finger domain containing 1	0.0071109	0.0192	31.59	18.46	1.71	up
228749_at	ZDBF2	zinc finger, DBF-type containing 2	0.0071993	0.0194	33.26	21.9	1.52	up
236023_at	CDK9	cyclin-dependent kinase 9	0.0073249	0.0197	247.64	96.84	2.56	up
228929_at	DNASE1	deoxyribonuclease I	0.0073065	0.0197	128.46	63.28	2.03	up
203231_s_at	ATXN1	ataxin 1	0.0073762	0.0198	477.39	304.93	1.57	up
201861_s_at	LRRFIP1	leucine rich repeat (in FLII) interacting protein 1	0.0073854	0.0198	39.03	17.21	2.27	up
212257_s_at	SMARCA2	SWI/SNF related, matrix associated, actin dependent regulator of chromatin, subfamily a, member 2	0.0074017	0.0198	89.91	40.5	2.22	up
1559227_s_at	VHL	von Hippel-Lindau tumor suppressor	0.0073742	0.0198	51.62	23.16	2.23	up
242210_at	ZNF24	Zinc finger protein 24	0.0074418	0.0199	59.99	37.97	1.58	up
208721_s_at	ANAPC5	anaphase promoting complex subunit 5	0.0074799	0.02	110.95	50.14	2.21	up
231990_at	USP15	ubiquitin specific peptidase 15	0.0074804	0.02	53.81	27.43	1.96	up
200607_s_at	RAD21	RAD21 homolog (S. pombe)	0.0075251	0.0201	75.93	33.61	2.26	up
1559490_at	LRCH3	leucine-rich repeats and calponin homology (CH) domain containing 3	0.0075721	0.0202	16.51	10	1.65	up
214004_s_at	VGLL4	vestigial like 4 (Drosophila)	0.0078202	0.0208	116.54	42.65	2.73	up
208982_at	PECAM1	platelet/endothelial cell adhesion molecule	0.0079797	0.0211	64.97	38.4	1.69	up
232466_at	CUL4A	Cullin 4A	0.0080068	0.0212	980.5	552.86	1.77	up
1558365_at	PGK1	phosphoglycerate kinase 1	0.0080055	0.0212	27.46	15.91	1.73	up
236988_x_at	ITGB2	integrin, beta 2 (complement component 3 receptor 3 and 4 subunit)	0.0080961	0.0214	42.35	20.76	2.04	up
227337_at	ANKRD37	ankyrin repeat domain 37	0.0081705	0.0215	35.26	20.08	1.76	up
1560754_at	CMTM7	CKLF-like MARVEL transmembrane domain containing 7	0.0081374	0.0215	395.45	255.64	1.55	up
1558782_a_at	LOC100130557	hypothetical LOC100130557	0.0081474	0.0215	27.7	18.17	1.52	up
232392_at	SFRS3	Splicing factor, arginine/serine-rich 3	0.0082536	0.0216	66.03	41.26	1.6	up
204042_at	WASF3	WAS protein family, member 3	0.0082702	0.0216	357.61	181.47	1.97	up
227200_at	ETV3	ets variant 3	0.0083607	0.0218	594.14	343.91	1.73	up
1556283_s_at	FGFR1OP2	FGFR1 oncogene partner 2	0.0083292	0.0218	17.89	10.16	1.76	up
234984_at	NEDD1	neural precursor cell expressed, developmentally down-regulated 1	0.0084421	0.022	92.3	49.24	1.87	up
227291_s_at	BOLA3	bolA homolog 3 (E. coli)	0.0085405	0.0221	21.69	12.66	1.71	up
226369_at	LOC338799	hypothetical LOC338799	0.0086186	0.0223	184.53	113.35	1.63	up
50400_at	PAOX	polyamine oxidase (exo-N4-amino)	0.0086665	0.0224	43.36	24.89	1.74	up
236621_at	RPS27	ribosomal protein S27	0.008769	0.0226	45.02	27.59	1.63	up
230664_at	H2BFXP	H2B histone family, member X, pseudogene	0.008842	0.0228	51.86	29.52	1.76	up
230574_at	LOC100130938	hypothetical LOC100130938	0.0088764	0.0228	61.71	40.18	1.54	up
226707_at	NAPRT1	nicotinate phosphoribosyltransferase domain containing 1	0.0088476	0.0228	208.55	110.19	1.89	up
217257_at	SH3BP2	SH3-domain binding protein 2	0.0088351	0.0228	43.96	26.48	1.66	up
226269_at	GDAP1	ganglioside-induced differentiation-associated protein 1	0.0089209	0.0229	19.85	13.14	1.51	up
215462_at	PLK3	polo-like kinase 3 (Drosophila)	0.0090212	0.0231	200.83	117.65	1.71	up
1555495_a_at	CWC27	CWC27 spliceosome-associated protein homolog (S. cerevisiae)	0.0091814	0.0234	56.24	36.52	1.54	up
241027_at	OPA1	optic atrophy 1 (autosomal dominant)	0.0093904	0.0239	139.65	78.42	1.78	up
231958_at	C3orf31	Chromosome 3 open reading frame 31	0.0094572	0.024	22.49	14.88	1.51	up
1564002_a_at	AKD1	adenylate kinase domain containing 1	0.0095147	0.0241	152.4	71.07	2.14	up
222522_x_at	MRPS10	mitochondrial ribosomal protein S10	0.0094833	0.0241	152.69	63.52	2.4	up
209324_s_at	RGS16	regulator of G-protein signaling 16	0.0095634	0.0242	87.72	52.81	1.66	up
48031_r_at	C5orf4	chromosome 5 open reading frame 4	0.009841	0.0249	594.7	331.41	1.79	up
242915_at	ZNF682	zinc finger protein 682	0.0100535	0.0253	71.36	45.2	1.58	up
223079_s_at	GLS	glutaminase	0.0101271	0.0255	15.81	10.1	1.57	up
244165_at	C10orf18	chromosome 10 open reading frame 18	0.0101791	0.0256	41.05	22.28	1.84	up
228423_at	MAP9	microtubule-associated protein 9	0.0102018	0.0256	38.39	21.91	1.75	up
227647_at	KCNE3	potassium voltage-gated channel, Isk-related family, member 3	0.0102753	0.0258	70.04	35.01	2	up
202877_s_at	CD93	CD93 molecule	0.0103634	0.026	62.27	30.95	2.01	up
234985_at	LDLRAD3	low density lipoprotein receptor class A domain containing 3	0.0105143	0.0262	36.63	21.29	1.72	up
235577_at	ZNF652	zinc finger protein 652	0.010492	0.0262	194.48	87.73	2.22	up
217047_s_at	FAM13A	family with sequence similarity 13, member A	0.0105947	0.0264	82.22	52.12	1.58	up
230777_s_at	PRDM15	PR domain containing 15	0.0107398	0.0267	17.1	10.19	1.68	up
228690_s_at	NDUFA11	NADH dehydrogenase (ubiquinone) 1 alpha subcomplex, 11, 14.7kDa	0.0107741	0.0268	115.28	41.77	2.76	up
235417_at	SPOCD1	SPOC domain containing 1	0.0108208	0.0268	51.87	32.27	1.61	up
222892_s_at	TMEM40	transmembrane protein 40	0.010793	0.0268	36.86	20.55	1.79	up
1563426_a_at	LOC644613	hypothetical protein LOC644613	0.0110292	0.0273	72.23	42.14	1.71	up
240257_at	SYNJ2	synaptojanin 2	0.0112075	0.0276	60.42	38.58	1.57	up
233543_s_at	FAM175A	family with sequence similarity 175, member A	0.0112922	0.0278	59.78	38.45	1.55	up
235818_at	VSTM1	V-set and transmembrane domain containing 1	0.011644	0.0285	24.92	11.88	2.1	up
212910_at	THAP11	THAP domain containing 11	0.0119085	0.029	20.64	11.94	1.73	up
213370_s_at	SFMBT1	Scm-like with four mbt domains 1	0.0119441	0.0291	200.59	129.62	1.55	up
213065_at	ZFC3H1	zinc finger, C3H1-type containing	0.0119585	0.0291	18.17	11.81	1.54	up
228719_at	ZSWIM7	zinc finger, SWIM-type containing 7	0.012019	0.0292	114.72	57.63	1.99	up
213298_at	NFIC	nuclear factor I/C (CCAAT-binding transcription factor)	0.0120311	0.0293	153.47	63.02	2.44	up
225622_at	PAG1	phosphoprotein associated with glycosphingolipid microdomains 1	0.012108	0.0294	512.5	326.58	1.57	up
213594_x_at	SFRS13A	splicing factor, arginine/serine-rich 13A	0.0123441	0.0299	195.31	127.07	1.54	up
212614_at	ARID5B	AT rich interactive domain 5B (MRF1-like)	0.0130049	0.0313	18.89	12.5	1.51	up
225751_at	RBM17	RNA binding motif protein 17	0.0130091	0.0313	30.67	12.18	2.52	up
202818_s_at	TCEB3	transcription elongation factor B (SIII), polypeptide 3 (110kDa, elongin A)	0.0130359	0.0313	383.94	155.58	2.47	up
227224_at	RALGPS2	Ral GEF with PH domain and SH3 binding motif 2	0.0132105	0.0316	21.75	13.66	1.59	up
242727_at	ARL5B	ADP-ribosylation factor-like 5B	0.0133589	0.0319	80.42	50.97	1.58	up
213346_at	C13orf27	chromosome 13 open reading frame 27	0.0133464	0.0319	113.75	59.3	1.92	up
226038_at	LONRF1	LON peptidase N-terminal domain and ring finger 1	0.0138621	0.033	69.16	43.94	1.57	up
228791_at	LOC100129502	hypothetical protein LOC100129502	0.0139464	0.0331	121.01	60.33	2.01	up
213049_at	RALGAPA1	Ral GTPase activating protein, alpha subunit 1 (catalytic)	0.0139522	0.0331	78	48.46	1.61	up
226387_at	RSBN1L	round spermatid basic protein 1-like	0.0139956	0.0332	34.12	20.18	1.69	up
208875_s_at	PAK2	p21 protein (Cdc42/Rac)-activated kinase 2	0.0142957	0.0338	192.8	119.88	1.61	up
235408_x_at	ZNF117	zinc finger protein 117	0.0143343	0.0339	16.65	10.55	1.58	up
1556323_at	CELF2	CUGBP, Elav-like family member 2	0.0145585	0.0344	58.41	32.93	1.77	up
1555120_at	CD96	CD96 molecule	0.0146315	0.0345	3327.98	1611	2.07	up
213511_s_at	MTMR1	myotubularin related protein 1	0.0147538	0.0347	64.82	34.31	1.89	up
235230_at	PLCXD2	phosphatidylinositol-specific phospholipase C, X domain containing 2	0.0148439	0.0349	833.39	498.26	1.67	up
214475_x_at	CAPN3	calpain 3, (p94)	0.014952	0.0351	2032.67	616.49	3.3	up
238587_at	UBASH3B	ubiquitin associated and SH3 domain containing B	0.0149641	0.0351	38.74	20.94	1.85	up
203470_s_at	PLEK	pleckstrin	0.0155492	0.0362	106.7	54.62	1.95	up
224917_at	MIR21	microRNA 21	0.0155752	0.0363	82.69	49.87	1.66	up
212293_at	HIPK1	homeodomain interacting protein kinase 1	0.0158757	0.0368	3642.78	1271.49	2.86	up
215160_x_at	LOC642236	similar to FRG1 protein (FSHD region gene 1 protein)	0.0160576	0.0372	53.89	26.61	2.03	up
201392_s_at	IGF2R	insulin-like growth factor 2 receptor	0.016181	0.0374	112.53	48.4	2.33	up
1554952_s_at	NLRP12	NLR family, pyrin domain containing 12	0.0161648	0.0374	22.58	14.19	1.59	up
209352_s_at	SIN3B	SIN3 homolog B, transcription regulator (yeast)	0.0161369	0.0374	86.3	30.75	2.81	up
229497_at	ANKDD1A	ankyrin repeat and death domain containing 1A	0.0164646	0.038	86.03	55.44	1.55	up
1553292_s_at	SGK494	uncharacterized serine/threonine-protein kinase SgK494	0.0166731	0.0384	17.89	10	1.79	up
204327_s_at	ZNF202	zinc finger protein 202	0.0168878	0.0389	244.67	133.35	1.83	up
244461_at	CYTSB	cytospin B	0.0169823	0.039	21.93	11.57	1.9	up
214505_s_at	FHL1	four and a half LIM domains 1	0.0169888	0.039	331.25	152.7	2.17	up
1554696_s_at	TYMS	thymidylate synthetase	0.017127	0.0393	46.69	23.3	2	up
239635_at	RBM14	RNA binding motif protein 14	0.0177758	0.0406	83.28	41.78	1.99	up
1556063_s_at	RPP30	ribonuclease P/MRP 30kDa subunit	0.0178105	0.0406	29.02	19.04	1.52	up
228099_at	ZNF550	zinc finger protein 550	0.0179433	0.0409	133.08	72.93	1.82	up
226684_at	ATG2B	ATG2 autophagy related 2 homolog B (S. cerevisiae)	0.0182856	0.0416	152.23	42.39	3.59	up
237202_at	PGPEP1	pyroglutamyl-peptidase I	0.018606	0.0421	77.69	30.2	2.57	up
226879_at	HVCN1	hydrogen voltage-gated channel 1	0.0189671	0.0429	39.04	24.21	1.61	up
221768_at	SFPQ	Splicing factor proline/glutamine-rich (polypyrimidine tract binding protein associated)	0.0191702	0.0433	449.72	98.3	4.57	up
200699_at	KDELR2	KDEL (Lys-Asp-Glu-Leu) endoplasmic reticulum protein retention receptor 2	0.019249	0.0434	22.9	15.21	1.51	up
1560199_x_at	LOC728153	similar to FAM133B protein	0.0192404	0.0434	274.21	178.99	1.53	up
204330_s_at	MRPS12	mitochondrial ribosomal protein S12	0.0192552	0.0434	186.79	72.8	2.57	up
230536_at	PBX4	pre-B-cell leukemia homeobox 4	0.0192982	0.0435	28.58	15.71	1.82	up
226771_at	ATP8B2	ATPase, class I, type 8B, member 2	0.019535	0.0439	75.82	47.83	1.59	up
238510_at	ZNF720	zinc finger protein 720	0.0195392	0.0439	82.62	49.88	1.66	up
228499_at	PFKFB4	6-phosphofructo-2-kinase/fructose-2,6-biphosphatase 4	0.0196454	0.0441	24.77	11.99	2.07	up
228545_at	ZNF148	zinc finger protein 148	0.0197723	0.0443	117.16	70.85	1.65	up
222668_at	KCTD15	potassium channel tetramerisation domain containing 15	0.0199656	0.0446	22.47	13.96	1.61	up
236703_at	NT5C2	5'-nucleotidase, cytosolic II	0.0201093	0.0448	32.82	17.71	1.85	up
232050_at	FLJ42627	hypothetical LOC645644	0.0204982	0.0456	41.16	15.38	2.68	up
236356_at	NDUFS1	NADH dehydrogenase (ubiquinone) Fe-S protein 1, 75kDa (NADH-coenzyme Q reductase)	0.0206478	0.0458	69.1	31.47	2.2	up
227088_at	PDE5A	phosphodiesterase 5A, cGMP-specific	0.0206493	0.0458	44.91	27.78	1.62	up
1568593_a_at	NUDT16P1	nudix (nucleoside diphosphate linked moiety X)-type motif 16 pseudogene 1	0.0209873	0.0464	101.13	65.65	1.54	up
233970_s_at	TRMT6	tRNA methyltransferase 6 homolog (S. cerevisiae)	0.021214	0.0469	60.32	39.62	1.52	up
232587_at	EML4	echinoderm microtubule associated protein like 4	0.0213158	0.047	22.82	14.75	1.55	up
223351_at	C17orf80	chromosome 17 open reading frame 80	0.0217078	0.0478	32.16	17.72	1.82	up
231771_at	GJB6	gap junction protein, beta 6, 30kDa	0.0216929	0.0478	259.74	165.79	1.57	up
223243_s_at	EDEM3	ER degradation enhancer, mannosidase alpha-like 3	0.0225847	0.0495	169.91	104.71	1.62	up
212979_s_at	FAM115A	family with sequence similarity 115, member A	0.0227736	0.0499	27.06	17.38	1.56	up
213174_at	TTC9	tetratricopeptide repeat domain 9	0.0228009	0.0499	84.75	55.1	1.54	up
