# Supplementary material for: CD4 T-cell transcriptome analysis reveals aberrant regulation of STAT3 and Wnt signaling pathways in rheumatoid arthritis: evidence from a case–control study
Source: Arthritis Res Ther. 2015 Mar 22;17(1):76. doi: 10.1186/s13075-015-0590-9 (PMC4392874; doi:10.1186/s13075-015-0590-9)
Supplement: Additional file 5: Table S5. — A table listing the 122 differentially expressed (DE) genes involved in immune response. [file 13075_2015_590_MOESM5_ESM.xlsx]

## Sheet: GO_immune respones
probe set ID	Gene symbol	Description	p-value	FDR	Geom mean of intensities in rheumatoid arthritis group	Geom mean of intensities in control group	Fold-change	UPorDOWN
212813_at	JAM3	junctional adhesion molecule 3	0.0013605	0.00487	72.62	48.19	1.51	up
214974_x_at	CXCL5	chemokine (C-X-C motif) ligand 5	7.71e-05	0.000454	87.13	155.44	0.56	down
227088_at	PDE5A	phosphodiesterase 5A, cGMP-specific	0.0206493	0.0458	44.91	27.78	1.62	up
214146_s_at	PPBP	pro-platelet basic protein (chemokine (C-X-C motif) ligand 7)	4.4e-06	4.12e-05	20.82	11.85	1.76	up
1555659_a_at	TREML1	triggering receptor expressed on myeloid cells-like 1	3.31e-05	0.000223	32.6	17.31	1.88	up
227394_at	NCAM1	neural cell adhesion molecule 1	2.16493e-14	4.38959e-14	150.1	71.64	2.1	up
209999_x_at	SOCS1	suppressor of cytokine signaling 1	8.39e-05	0.000487	19.91	12.44	1.6	up
214228_x_at	TNFRSF4	tumor necrosis factor receptor superfamily, member 4	0.0003423	0.00156	155.46	82.76	1.88	up
216834_at	RGS1	regulator of G-protein signaling 1	1.9e-06	2.09e-05	71.69	42.75	1.68	up
241819_at	TNFSF8	tumor necrosis factor (ligand) superfamily, member 8	9.69e-05	0.000546	100.95	56.44	1.79	up
214551_s_at	CD7	CD7 molecule	0.0024366	0.0079	20.1	11.22	1.79	up
214012_at	ERAP1	endoplasmic reticulum aminopeptidase 1	0.0008457	0.0033	154	71.01	2.17	up
225330_at	IGF1R	insulin-like growth factor 1 receptor	3.6e-06	3.47e-05	26.6	12.78	2.08	up
215201_at	REPS1	RALBP1 associated Eps domain containing 1	0.0003547	0.0016	488.24	278.45	1.75	up
212436_at	TRIM33	tripartite motif-containing 33	1e-06	1.21e-05	29.24	64.68	0.45	down
213856_at	CD47	CD47 molecule	0.0069035	0.0188	35.06	76.82	0.46	down
228613_at	RAB11FIP3	RAB11 family interacting protein 3 (class II)	5.3e-05	0.00033	21.05	36.34	0.58	down
226474_at	NLRC5	NLR family, CARD domain containing 5	0.000745	0.00297	27.64	42.06	0.66	down
1555613_a_at	ZAP70	zeta-chain (TCR) associated protein kinase 70kDa	5e-07	6.82e-06	30.96	52.5	0.59	down
212764_at	ZEB1	zinc finger E-box binding homeobox 1	0.0042336	0.0125	132.84	72.69	1.83	up
226660_at	RPS6KB1	ribosomal protein S6 kinase, 70kDa, polypeptide 1	0.0032862	0.0101	28.4	46.4	0.61	down
229882_at	RPS15A	ribosomal protein S15a	8.27e-05	0.000482	33.06	18.18	1.82	up
237107_at	PRKRA	protein kinase, interferon-inducible double stranded RNA dependent activator	5.04e-05	0.000317	316.31	198.38	1.59	up
212628_at	PKN2	protein kinase N2	9.48e-05	0.000537	63.51	145.17	0.44	down
212990_at	SYNJ1	synaptojanin 1	1.02918e-13	1.95422e-13	126.02	42.68	2.95	up
236539_at	PTPN22	protein tyrosine phosphatase, non-receptor type 22 (lymphoid)	0.0001647	0.000849	236.11	517.14	0.46	down
203447_at	PSMD5	proteasome (prosome, macropain) 26S subunit, non-ATPase, 5	0.0006919	0.00281	68.23	141.87	0.48	down
212218_s_at	FASN	fatty acid synthase	6e-06	5.33e-05	105.44	315.87	0.33	down
225754_at	AP1G1	adaptor-related protein complex 1, gamma 1 subunit	2.86e-05	0.000197	41.83	74.01	0.57	down
226048_at	MAPK8	mitogen-activated protein kinase 8	1.85e-05	0.000136	32.4	81.1	0.4	down
201370_s_at	CUL3	cullin 3	4e-07	5.59e-06	53.3	137.06	0.39	down
244321_at	PGAP1	post-GPI attachment to proteins 1	0.0005166	0.00221	36.9	58.67	0.63	down
225594_at	CREBZF	CREB/ATF bZIP transcription factor	3.5e-06	3.4e-05	83.78	41.91	2	up
237180_at	PSME4	Proteasome (prosome, macropain) activator subunit 4	0.0001158	0.000639	209.02	110.88	1.89	up
227462_at	ERAP2	endoplasmic reticulum aminopeptidase 2	9.20517e-09	1.16652e-08	26.03	14.64	1.78	up
237426_at	SP100	SP100 nuclear antigen	0.0020597	0.00683	62.21	32.65	1.91	up
206359_at	SOCS3	suppressor of cytokine signaling 3	0.000865	0.00336	17.4	28.08	0.62	down
221978_at	HLA-F	major histocompatibility complex, class I, F	4.8e-06	4.4e-05	33.1	53.26	0.62	down
214895_s_at	ADAM10	ADAM metallopeptidase domain 10	0.0025712	0.00828	45.79	93.3	0.49	down
204780_s_at	FAS	Fas (TNF receptor superfamily, member 6)	0.0017472	0.00594	28.44	50.23	0.57	down
214315_x_at	CALR	calreticulin	0.0007399	0.00296	104.51	166.08	0.63	down
215209_at	SEC24D	SEC24 family, member D (S. cerevisiae)	2.81e-05	0.000194	338.67	188.86	1.79	up
215501_s_at	DUSP10	dual specificity phosphatase 10	0.0014439	0.00512	76.77	43.81	1.75	up
217507_at	SLC11A1	solute carrier family 11 (proton-coupled divalent metal ion transporters), member 1	0.0032145	0.00991	25.63	15.71	1.63	up
244235_at	IVNS1ABP	influenza virus NS1A binding protein	0.0003246	0.00149	67.49	39.3	1.72	up
213532_at	ADAM17	ADAM metallopeptidase domain 17	0.0002415	0.00118	64.25	38.87	1.65	up
242176_at	MEF2A	Myocyte enhancer factor 2A	0.0002631	0.00126	291.39	144.47	2.02	up
230052_s_at	NFKBID	nuclear factor of kappa light polypeptide gene enhancer in B-cells inhibitor, delta	8.3e-06	7.03e-05	28.35	13.79	2.06	up
1554997_a_at	PTGS2	prostaglandin-endoperoxide synthase 2 (prostaglandin G/H synthase and cyclooxygenase)	1.46e-05	0.000113	131.85	69.06	1.91	up
1555950_a_at	CD55	CD55 molecule, decay accelerating factor for complement (Cromer blood group)	0.0020682	0.00685	61.82	35.06	1.76	up
234411_x_at	CD44	CD44 molecule (Indian blood group)	0.0005604	0.00236	157.33	92.61	1.7	up
208650_s_at	CD24	CD24 molecule	7.37995e-08	8.44243e-08	1348.05	682.39	1.98	up
212977_at	CXCR7	chemokine (C-X-C motif) receptor 7	2.5e-06	2.56e-05	257.06	121.7	2.11	up
215009_s_at	SEC31A	SEC31 homolog A (S. cerevisiae)	0.0001615	0.000836	28.97	56.81	0.51	down
232304_at	PELI1	Pellino homolog 1 (Drosophila)	2.94e-05	0.000201	297.05	522.66	0.57	down
215611_at	TCF12	transcription factor 12	0.010597	0.0264	70.24	115.25	0.61	down
214352_s_at	KRAS	v-Ki-ras2 Kirsten rat sarcoma viral oncogene homolog	4.6e-06	4.25e-05	105.82	286.97	0.37	down
233314_at	PTEN	phosphatase and tensin homolog	4.2e-06	3.96e-05	16.36	10.01	1.63	up
1557586_s_at	ATP6V1H	ATPase, H+ transporting, lysosomal 50/57kDa, V1 subunit H	1.07e-05	8.71e-05	415.86	193.23	2.15	up
217371_s_at	IL15	interleukin 15	0.0005148	0.0022	66.77	30.7	2.18	up
1562031_at	JAK2	Janus kinase 2	1.61e-05	0.000122	150.18	80.53	1.87	up
214995_s_at	APOBEC3F	apolipoprotein B mRNA editing enzyme, catalytic polypeptide-like 3F	0.000172	0.00088	106.39	176.72	0.6	down
212671_s_at	HLA-DQA1	major histocompatibility complex, class II, DQ alpha 1	0.0058294	0.0163	28.87	50.64	0.57	down
235451_at	SMAD5	SMAD family member 5	0.0001105	0.000614	48.15	29.8	1.62	up
202607_at	NDST1	N-deacetylase/N-sulfotransferase (heparan glucosaminyl) 1	0.002076	0.00687	47	108.1	0.43	down
223465_at	COL4A3BP	collagen, type IV, alpha 3 (Goodpasture antigen) binding protein	8.32667e-15	1.80003e-14	169.13	727.3	0.23	down
235754_at	HFE	hemochromatosis	6e-07	7.97e-06	129.78	289.28	0.45	down
224806_at	TRIM25	tripartite motif-containing 25	0.0050835	0.0145	170.87	278.21	0.61	down
225115_at	HIPK2	homeodomain interacting protein kinase 2	2.4e-06	2.48e-05	63.16	26.76	2.36	up
214352_s_at	KRAS	v-Ki-ras2 Kirsten rat sarcoma viral oncogene homolog	4.6e-06	4.25e-05	105.82	286.97	0.37	down
202844_s_at	RALBP1	ralA binding protein 1	0.0009691	0.00369	80.11	35.64	2.25	up
208710_s_at	AP3D1	adaptor-related protein complex 3, delta 1 subunit	0.0003853	0.00172	401.34	158.37	2.53	up
1568964_x_at	SPN	sialophorin	0.0006133	0.00254	33.59	14.84	2.26	up
201593_s_at	ZC3H15	zinc finger CCCH-type containing 15	7e-07	9.11e-06	144.42	58.63	2.46	up
212420_at	ELF1	E74-like factor 1 (ets domain transcription factor)	0.0003227	0.00149	38.53	17.29	2.23	up
227817_at	PRKCB	protein kinase C, beta	2.22045e-16	6.10104e-16	628.36	277.75	2.26	up
202354_s_at	GTF2F1	general transcription factor IIF, polypeptide 1, 74kDa	5.2e-06	4.7e-05	689.69	309.38	2.23	up
231829_at	MAVS	mitochondrial antiviral signaling protein	1e-07	1.69e-06	124.24	51.22	2.43	up
1557910_at	HSP90AB1	heat shock protein 90kDa alpha (cytosolic), class B member 1	3.4e-06	3.32e-05	94.35	42.76	2.21	up
214012_at	ERAP1	endoplasmic reticulum aminopeptidase 1	0.0008457	0.0033	154	71.01	2.17	up
238797_at	TRIM11	tripartite motif-containing 11	0.0001143	0.000632	77.64	28.53	2.72	up
221739_at	C19orf10	chromosome 19 open reading frame 10	1.54e-05	0.000118	91.48	38.24	2.39	up
1552274_at	PXK	PX domain containing serine/threonine kinase	0.000676	0.00275	96.46	42.17	2.29	up
1556389_at	CNPY3	canopy 3 homolog (zebrafish)	0.0006256	0.00258	42.99	17.92	2.4	up
225565_at	CREB1	cAMP responsive element binding protein 1	3.6956e-08	4.41669e-08	14.38	71.11	0.2	down
213229_at	DICER1	dicer 1, ribonuclease type III	6.66134e-16	1.67387e-15	28.73	66.22	0.43	down
205285_s_at	FYB	FYN binding protein	0	0	13.26	29.56	0.45	down
201008_s_at	TXNIP	thioredoxin interacting protein	2.1e-06	2.27e-05	142.82	330.41	0.43	down
1559883_s_at	SAMHD1	SAM domain and HD domain 1	1e-07	1.69e-06	49.9	110.87	0.45	down
238738_at	PSMD7	Proteasome (prosome, macropain) 26S subunit, non-ATPase, 7	0.0002443	0.00119	21.75	51.99	0.42	down
214045_at	LIAS	lipoic acid synthetase	0.0001465	0.00077	91.24	178.85	0.51	down
214214_s_at	C1QBP	complement component 1, q subcomponent binding protein	3e-07	4.32e-06	389.44	706.02	0.55	down
213539_at	CD3D	CD3d molecule, delta (CD3-TCR complex)	1.02e-05	8.36e-05	110.73	62.61	1.77	up
39729_at	PRDX2	peroxiredoxin 2	0.0037674	0.0113	110.99	59.46	1.87	up
1555120_at	CD96	CD96 molecule	0.0146315	0.0345	3327.98	1611	2.07	up
225330_at	IGF1R	insulin-like growth factor 1 receptor	3.6e-06	3.47e-05	26.6	12.78	2.08	up
231798_at	NOG	noggin	0.0002813	0.00133	104.98	64.64	1.62	up
1560754_at	CMTM7	CKLF-like MARVEL transmembrane domain containing 7	0.0081374	0.0215	395.45	255.64	1.55	up
239272_at	MMP28	matrix metallopeptidase 28	0.0002044	0.00102	24.34	12.48	1.95	up
236988_x_at	ITGB2	integrin, beta 2 (complement component 3 receptor 3 and 4 subunit)	0.0080961	0.0214	42.35	20.76	2.04	up
213517_at	PCBP2	poly(rC) binding protein 2	0.0002739	0.0013	379.35	250.32	1.52	up
241275_at	CAPZA1	Capping protein (actin filament) muscle Z-line, alpha 1	0.0017081	0.00585	22.5	13.92	1.62	up
231866_at	LNPEP	leucyl/cystinyl aminopeptidase	0.0039424	0.0118	314.15	199.06	1.58	up
1552480_s_at	PTPRC	protein tyrosine phosphatase, receptor type, C	1.28e-05	0.000101	81.23	42.92	1.89	up
213348_at	CDKN1C	cyclin-dependent kinase inhibitor 1C (p57, Kip2)	9.92e-05	0.000556	140.18	77.03	1.82	up
211991_s_at	HLA-DPA1	major histocompatibility complex, class II, DP alpha 1	0.0001819	0.000921	41.35	26.35	1.57	up
222912_at	ARRB1	arrestin, beta 1	0.0045509	0.0133	182.16	91.89	1.98	up
215633_x_at	LST1	leukocyte specific transcript 1	5e-06	4.55e-05	283.01	162.86	1.74	up
215051_x_at	AIF1	allograft inflammatory factor 1	7.11e-05	0.000424	63.5	38.03	1.67	up
229937_x_at	LILRB1	Leukocyte immunoglobulin-like receptor, subfamily B (with TM and ITIM domains), member 1	4.52283e-12	7.38728e-12	480.53	220.54	2.18	up
226068_at	SYK	spleen tyrosine kinase	0.0017571	0.00596	50.61	26.31	1.92	up
231736_x_at	MGST1	microsomal glutathione S-transferase 1	8.8806e-10	1.21437e-09	79.98	38.46	2.08	up
1552263_at	MAPK1	mitogen-activated protein kinase 1	1.62958e-05	1.69292e-05	1149.24	661.65	1.74	up
1554952_s_at	NLRP12	NLR family, pyrin domain containing 12	0.0161648	0.0374	22.58	14.19	1.59	up
226216_at	INSR	insulin receptor	1.73e-05	0.00013	141.96	79.03	1.8	up
1555214_a_at	CLEC7A	C-type lectin domain family 7, member A	1e-07	1.69e-06	35.41	18.85	1.88	up
208875_s_at	PAK2	p21 protein (Cdc42/Rac)-activated kinase 2	0.0142957	0.0338	192.8	119.88	1.61	up
225661_at	IFNAR1	interferon (alpha, beta and omega) receptor 1	0.0004589	0.002	122.52	56.85	2.16	up
200615_s_at	AP2B1	adaptor-related protein complex 2, beta 1 subunit	0.0021524	0.00709	74.46	47.79	1.56	up
232666_at	OAS3	2'-5'-oligoadenylate synthetase 3, 100kDa	1.49e-05	0.000115	140.44	81.59	1.72	up
230052_s_at	NFKBID	nuclear factor of kappa light polypeptide gene enhancer in B-cells inhibitor, delta	8.3e-06	7.03e-05	28.35	13.79	2.06	up
229967_at	CMTM2	CKLF-like MARVEL transmembrane domain containing 2	0.0026587	0.00851	146.99	80.54	1.83	up
