# Supplementary material for: CD4 T-cell transcriptome analysis reveals aberrant regulation of STAT3 and Wnt signaling pathways in rheumatoid arthritis: evidence from a case–control study
Source: Arthritis Res Ther. 2015 Mar 22;17(1):76. doi: 10.1186/s13075-015-0590-9 (PMC4392874; doi:10.1186/s13075-015-0590-9)
Supplement: Additional file 6: Table S6. — A table listing the 40 differentially expressed (DE) genes involved in T-cell response. [file 13075_2015_590_MOESM6_ESM.xlsx]

## Sheet: GO_T cell respones
probe set ID	Gene symbol	Description	p-value	FDR	Geom mean of intensities in rheumatoid arthritis group	Geom mean of intensities in control group	Fold-change	UPorDOWN
217371_s_at	IL15	interleukin 15	0.0005148	0.0022	66.77	30.7	2.18	up
1555372_at	BCL2L11	BCL2-like 11 (apoptosis facilitator)	0.0002415	0.00118	285.64	170.29	1.68	up
212171_x_at	VEGFA	vascular endothelial growth factor A	0.0019522	0.00652	483.04	300.89	1.61	up
212628_at	PKN2	protein kinase N2	9.48e-05	0.000537	63.51	145.17	0.44	down
236539_at	PTPN22	protein tyrosine phosphatase, non-receptor type 22 (lymphoid)	0.0001647	0.000849	236.11	517.14	0.46	down
228857_at	GNL1	guanine nucleotide binding protein-like 1	0.0005542	0.00234	57.64	108.61	0.53	down
202146_at	IFRD1	interferon-related developmental regulator 1	2e-07	3.05e-06	128.48	247	0.52	down
214895_s_at	ADAM10	ADAM metallopeptidase domain 10	0.0025712	0.00828	45.79	93.3	0.49	down
213532_at	ADAM17	ADAM metallopeptidase domain 17	0.0002415	0.00118	64.25	38.87	1.65	up
217507_at	SLC11A1	solute carrier family 11 (proton-coupled divalent metal ion transporters), member 1	0.0032145	0.00991	25.63	15.71	1.63	up
212723_at	JMJD6	jumonji domain containing 6	1e-07	1.69e-06	366.56	177.95	2.06	up
208650_s_at	CD24	CD24 molecule	7.37995e-08	8.44243e-08	1348.05	682.39	1.98	up
233314_at	PTEN	phosphatase and tensin homolog	4.2e-06	3.96e-05	16.36	10.01	1.63	up
227088_at	PDE5A	phosphodiesterase 5A, cGMP-specific	0.0206493	0.0458	44.91	27.78	1.62	up
214228_x_at	TNFRSF4	tumor necrosis factor receptor superfamily, member 4	0.0003423	0.00156	155.46	82.76	1.88	up
235980_at	PIK3CA	Phosphoinositide-3-kinase, catalytic, alpha polypeptide	0.0006409	0.00264	401.26	235.77	1.7	up
214551_s_at	CD7	CD7 molecule	0.0024366	0.0079	20.1	11.22	1.79	up
213856_at	CD47	CD47 molecule	0.0069035	0.0188	35.06	76.82	0.46	down
1555613_a_at	ZAP70	zeta-chain (TCR) associated protein kinase 70kDa	5e-07	6.82e-06	30.96	52.5	0.59	down
225622_at	PAG1	phosphoprotein associated with glycosphingolipid microdomains 1	0.012108	0.0294	512.5	326.58	1.57	up
217147_s_at	TRAT1	T cell receptor associated transmembrane adaptor 1	1e-07	1.69e-06	225.72	110.96	2.03	up
211991_s_at	HLA-DPA1	major histocompatibility complex, class II, DP alpha 1	0.0001819	0.000921	41.35	26.35	1.57	up
214119_s_at	FKBP1A	FK506 binding protein 1A, 12kDa	0.0017374	0.00592	36.88	57.11	0.65	down
213668_s_at	SOX4	SRY (sex determining region Y)-box 4	1.03029e-13	1.95422e-13	35.3	73.95	0.48	down
212671_s_at	HLA-DQA1	major histocompatibility complex, class II, DQ alpha 1	0.0058294	0.0163	28.87	50.64	0.57	down
1568964_x_at	SPN	sialophorin	0.0006133	0.00254	33.59	14.84	2.26	up
221739_at	C19orf10	chromosome 19 open reading frame 10	1.54e-05	0.000118	91.48	38.24	2.39	up
215075_s_at	GRB2	growth factor receptor-bound protein 2	1.62e-05	0.000122	185.25	78.62	2.36	up
208875_s_at	PAK2	p21 protein (Cdc42/Rac)-activated kinase 2	0.0142957	0.0338	192.8	119.88	1.61	up
1552263_at	MAPK1	mitogen-activated protein kinase 1	1.62958e-05	1.69292e-05	1149.24	661.65	1.74	up
226507_at	PAK1	p21 protein (Cdc42/Rac)-activated kinase 1	2.33e-05	0.000166	27.51	16.27	1.69	up
1555214_a_at	CLEC7A	C-type lectin domain family 7, member A	1e-07	1.69e-06	35.41	18.85	1.88	up
222895_s_at	BCL11B	B-cell CLL/lymphoma 11B (zinc finger protein)	0.0028213	0.00891	18.69	10.23	1.83	up
39729_at	PRDX2	peroxiredoxin 2	0.0037674	0.0113	110.99	59.46	1.87	up
213539_at	CD3D	CD3d molecule, delta (CD3-TCR complex)	1.02e-05	8.36e-05	110.73	62.61	1.77	up
212420_at	ELF1	E74-like factor 1 (ets domain transcription factor)	0.0003227	0.00149	38.53	17.29	2.23	up
201683_x_at	TOX4	TOX high mobility group box family member 4	1.2e-06	1.4e-05	85.3	36.77	2.32	up
205285_s_at	FYB	FYN binding protein	0	0	13.26	29.56	0.45	down
212249_at	PIK3R1	phosphoinositide-3-kinase, regulatory subunit 1 (alpha)	1.92e-05	0.000141	54.87	95.16	0.58	down
1552480_s_at	PTPRC	protein tyrosine phosphatase, receptor type, C	1.28e-05	0.000101	81.23	42.92	1.89	up
