# Supplementary material for: CD4 T-cell transcriptome analysis reveals aberrant regulation of STAT3 and Wnt signaling pathways in rheumatoid arthritis: evidence from a case–control study
Source: Arthritis Res Ther. 2015 Mar 22;17(1):76. doi: 10.1186/s13075-015-0590-9 (PMC4392874; doi:10.1186/s13075-015-0590-9)
Supplement: Additional file 8: Table S8. — A table listing the 89 differentially expressed (DE) genes involved in regulation of kinase and phosphatase activity. [file 13075_2015_590_MOESM8_ESM.xlsx]

## Sheet: GO_ kinase
probe set ID	Gene symbol	Description	p-value	FDR	Geom mean of intensities in rheumatoid arthritis group	Geom mean of intensities in control group	Fold-change	UPorDOWN
1562031_at	JAK2	Janus kinase 2	1.61e-05	0.000122	150.18	80.53	1.87	up
217371_s_at	IL15	interleukin 15	0.0005148	0.0022	66.77	30.7	2.18	up
206359_at	SOCS3	suppressor of cytokine signaling 3	0.000865	0.00336	17.4	28.08	0.62	down
208650_s_at	CD24	CD24 molecule	7.37995e-08	8.44243e-08	1348.05	682.39	1.98	up
37117_at	ARHGAP8	Rho GTPase activating protein 8	6e-05	0.000367	54.57	32.82	1.66	up
215501_s_at	DUSP10	dual specificity phosphatase 10	0.0014439	0.00512	76.77	43.81	1.75	up
225149_at	PCID2	PCI domain containing 2	0.0169691	0.039	70.36	123.08	0.57	down
227073_at	MAP3K2	mitogen-activated protein kinase kinase kinase 2	5.77316e-15	1.29566e-14	49.22	98.47	0.5	down
225339_at	SPAG9	sperm associated antigen 9	2.07939e-08	2.51581e-08	57.26	180.24	0.32	down
202816_s_at	SS18	synovial sarcoma translocation, chromosome 18	2.61e-05	0.000183	13.87	34.15	0.41	down
234411_x_at	CD44	CD44 molecule (Indian blood group)	0.0005604	0.00236	157.33	92.61	1.7	up
242176_at	MEF2A	Myocyte enhancer factor 2A	0.0002631	0.00126	291.39	144.47	2.02	up
230052_s_at	NFKBID	nuclear factor of kappa light polypeptide gene enhancer in B-cells inhibitor, delta	8.3e-06	7.03e-05	28.35	13.79	2.06	up
217507_at	SLC11A1	solute carrier family 11 (proton-coupled divalent metal ion transporters), member 1	0.0032145	0.00991	25.63	15.71	1.63	up
1558732_at	MAP4K4	mitogen-activated protein kinase kinase kinase kinase 4	0.0011561	0.00425	16.64	10.08	1.65	up
214352_s_at	KRAS	v-Ki-ras2 Kirsten rat sarcoma viral oncogene homolog	4.6e-06	4.25e-05	105.82	286.97	0.37	down
232304_at	PELI1	Pellino homolog 1 (Drosophila)	2.94e-05	0.000201	297.05	522.66	0.57	down
215231_at	PRKAG2	Protein kinase, AMP-activated, gamma 2 non-catalytic subunit	0.0008461	0.0033	258.24	141.71	1.82	up
233314_at	PTEN	phosphatase and tensin homolog	4.2e-06	3.96e-05	16.36	10.01	1.63	up
216979_at	NR4A3	nuclear receptor subfamily 4, group A, member 3	0.005627	0.0158	63.23	96.5	0.66	down
212171_x_at	VEGFA	vascular endothelial growth factor A	0.0019522	0.00652	483.04	300.89	1.61	up
1558365_at	PGK1	phosphoglycerate kinase 1	0.0080055	0.0212	27.46	15.91	1.73	up
214395_x_at	EEF1D	eukaryotic translation elongation factor 1 delta (guanine nucleotide exchange protein)	0.0019689	0.00657	16.94	29.71	0.57	down
1555827_at	CCNL1	Cyclin L1	0.0034981	0.0106	31.8	57.03	0.56	down
238528_at	UBR1	ubiquitin protein ligase E3 component n-recognin 1	0.0044857	0.0131	17.11	28.79	0.59	down
216199_s_at	MAP3K4	mitogen-activated protein kinase kinase kinase 4	4e-07	5.59e-06	41.67	72.03	0.58	down
214683_s_at	CLK1	CDC-like kinase 1	0	0	26.23	54.62	0.48	down
212366_at	ZNF292	zinc finger protein 292	2.22899e-05	2.30748e-05	150.24	254.17	0.59	down
226048_at	MAPK8	mitogen-activated protein kinase 8	1.85e-05	0.000136	32.4	81.1	0.4	down
212633_at	KIAA0776	KIAA0776	3.33067e-16	8.66563e-16	10.57	20.09	0.53	down
212628_at	PKN2	protein kinase N2	9.48e-05	0.000537	63.51	145.17	0.44	down
214917_at	PRKAA1	protein kinase, AMP-activated, alpha 1 catalytic subunit	8.5e-06	7.15e-05	100.14	174.78	0.57	down
235980_at	PIK3CA	Phosphoinositide-3-kinase, catalytic, alpha polypeptide	0.0006409	0.00264	401.26	235.77	1.7	up
226660_at	RPS6KB1	ribosomal protein S6 kinase, 70kDa, polypeptide 1	0.0032862	0.0101	28.4	46.4	0.61	down
214246_x_at	MINK1	misshapen-like kinase 1 (zebrafish)	2.34e-05	0.000167	2163.96	632.15	3.42	up
213107_at	TNIK	TRAF2 and NCK interacting kinase	1e-07	1.69e-06	32.15	57.94	0.55	down
226474_at	NLRC5	NLR family, CARD domain containing 5	0.000745	0.00297	27.64	42.06	0.66	down
1555613_a_at	ZAP70	zeta-chain (TCR) associated protein kinase 70kDa	5e-07	6.82e-06	30.96	52.5	0.59	down
214551_s_at	CD7	CD7 molecule	0.0024366	0.0079	20.1	11.22	1.79	up
225330_at	IGF1R	insulin-like growth factor 1 receptor	3.6e-06	3.47e-05	26.6	12.78	2.08	up
235780_at	PRKACB	protein kinase, cAMP-dependent, catalytic, beta	0.0003208	0.00148	31.97	21.11	1.51	up
217147_s_at	TRAT1	T cell receptor associated transmembrane adaptor 1	1e-07	1.69e-06	225.72	110.96	2.03	up
228480_at	VAPA	VAMP (vesicle-associated membrane protein)-associated protein A, 33kDa	6e-07	7.97e-06	50.61	26.11	1.94	up
209999_x_at	SOCS1	suppressor of cytokine signaling 1	8.39e-05	0.000487	19.91	12.44	1.6	up
214228_x_at	TNFRSF4	tumor necrosis factor receptor superfamily, member 4	0.0003423	0.00156	155.46	82.76	1.88	up
237367_x_at	CFLAR	CASP8 and FADD-like apoptosis regulator	0.0003103	0.00144	42.57	22.44	1.9	up
203470_s_at	PLEK	pleckstrin	0.0155492	0.0362	106.7	54.62	1.95	up
213348_at	CDKN1C	cyclin-dependent kinase inhibitor 1C (p57, Kip2)	9.92e-05	0.000556	140.18	77.03	1.82	up
214119_s_at	FKBP1A	FK506 binding protein 1A, 12kDa	0.0017374	0.00592	36.88	57.11	0.65	down
222912_at	ARRB1	arrestin, beta 1	0.0045509	0.0133	182.16	91.89	1.98	up
1552263_at	MAPK1	mitogen-activated protein kinase 1	1.62958e-05	1.69292e-05	1149.24	661.65	1.74	up
1554952_s_at	NLRP12	NLR family, pyrin domain containing 12	0.0161648	0.0374	22.58	14.19	1.59	up
226507_at	PAK1	p21 protein (Cdc42/Rac)-activated kinase 1	2.33e-05	0.000166	27.51	16.27	1.69	up
225661_at	IFNAR1	interferon (alpha, beta and omega) receptor 1	0.0004589	0.002	122.52	56.85	2.16	up
208875_s_at	PAK2	p21 protein (Cdc42/Rac)-activated kinase 2	0.0142957	0.0338	192.8	119.88	1.61	up
226216_at	INSR	insulin receptor	1.73e-05	0.00013	141.96	79.03	1.8	up
223519_at	ZAK	sterile alpha motif and leucine zipper containing kinase AZK	0.0003364	0.00154	75.25	43.24	1.74	up
226068_at	SYK	spleen tyrosine kinase	0.0017571	0.00596	50.61	26.31	1.92	up
228950_s_at	WLS	wntless homolog (Drosophila)	0.00111	0.00412	37.73	17.38	2.17	up
203231_s_at	ATXN1	ataxin 1	0.0073762	0.0198	477.39	304.93	1.57	up
226117_at	TIFA	TRAF-interacting protein with forkhead-associated domain	1.7e-06	1.89e-05	278.46	149.6	1.86	up
215075_s_at	GRB2	growth factor receptor-bound protein 2	1.62e-05	0.000122	185.25	78.62	2.36	up
216234_s_at	PRKACA	protein kinase, cAMP-dependent, catalytic, alpha	7.5e-06	6.45e-05	26.03	102.32	0.25	down
202607_at	NDST1	N-deacetylase/N-sulfotransferase (heparan glucosaminyl) 1	0.002076	0.00687	47	108.1	0.43	down
221830_at	RAP2A	RAP2A, member of RAS oncogene family	6.8e-06	5.94e-05	28.59	93.04	0.31	down
229010_at	CBL	Cas-Br-M (murine) ecotropic retroviral transforming sequence	0	0	158.59	71.41	2.22	up
212162_at	KIDINS220	kinase D-interacting substrate, 220kDa	5.691e-13	1.00792e-12	641.47	258.79	2.48	up
225565_at	CREB1	cAMP responsive element binding protein 1	3.6956e-08	4.41669e-08	14.38	71.11	0.2	down
212332_at	RBL2	retinoblastoma-like 2 (p130)	1.2e-05	9.58e-05	120.89	52.98	2.28	up
224863_at	GNAQ	guanine nucleotide binding protein (G protein), q polypeptide	1e-07	1.69e-06	419.58	171.2	2.45	up
225115_at	HIPK2	homeodomain interacting protein kinase 2	2.4e-06	2.48e-05	63.16	26.76	2.36	up
211993_at	WNK1	WNK lysine deficient protein kinase 1	0.0038373	0.0115	210.47	95.09	2.21	up
231829_at	MAVS	mitochondrial antiviral signaling protein	1e-07	1.69e-06	124.24	51.22	2.43	up
227817_at	PRKCB	protein kinase C, beta	2.22045e-16	6.10104e-16	628.36	277.75	2.26	up
213718_at	RBM4	RNA binding motif protein 4	7.5e-05	0.000443	32.82	12.77	2.57	up
205285_s_at	FYB	FYN binding protein	0	0	13.26	29.56	0.45	down
213922_at	TTBK2	tau tubulin kinase 2	0.0003689	0.00166	152.96	350.4	0.44	down
211941_s_at	PEBP1	phosphatidylethanolamine binding protein 1	0	0	16.37	39.86	0.41	down
222404_x_at	PTPLAD1	protein tyrosine phosphatase-like A domain containing 1	1.61031e-11	2.49175e-11	15.1	44.2	0.34	down
200951_s_at	CCND2	cyclin D2	9.30478e-13	1.60918e-12	161.99	386.3	0.42	down
236259_at	STK4	serine/threonine kinase 4	0	0	20.97	52.93	0.4	down
231775_at	TNFRSF10A	tumor necrosis factor receptor superfamily, member 10a	1.4988e-14	3.17013e-14	30.16	78.96	0.38	down
208900_s_at	TOP1	topoisomerase (DNA) I	3.6e-06	3.47e-05	29.66	13.27	2.23	up
224631_at	ZFP91	zinc finger protein 91 homolog (mouse)	9e-07	1.11e-05	17.48	49.34	0.35	down
39729_at	PRDX2	peroxiredoxin 2	0.0037674	0.0113	110.99	59.46	1.87	up
212249_at	PIK3R1	phosphoinositide-3-kinase, regulatory subunit 1 (alpha)	1.92e-05	0.000141	54.87	95.16	0.58	down
1559307_s_at	RBL1	retinoblastoma-like 1 (p107)	0.0042462	0.0125	59.07	28.23	2.09	up
229713_at	PIP4K2A	Phosphatidylinositol-5-phosphate 4-kinase, type II, alpha	0.0005052	0.00217	83.28	54.18	1.54	up
1552480_s_at	PTPRC	protein tyrosine phosphatase, receptor type, C	1.28e-05	0.000101	81.23	42.92	1.89	up
