# Supplementary material for: CD4 T-cell transcriptome analysis reveals aberrant regulation of STAT3 and Wnt signaling pathways in rheumatoid arthritis: evidence from a case–control study
Source: Arthritis Res Ther. 2015 Mar 22;17(1):76. doi: 10.1186/s13075-015-0590-9 (PMC4392874; doi:10.1186/s13075-015-0590-9)
Supplement: Additional file 9: Table S9. — A table listing the 23 differentially expressed (DE) genes involved in regulation of Wnt receptor signaling. [file 13075_2015_590_MOESM9_ESM.xlsx]

## Sheet: GO_Wnt signaling
probe set ID	Gene symbol	Description	p-value	FDR	Geom mean of intensities in rheumatoid arthritis group	Geom mean of intensities in control group	Fold-change	UPorDOWN
1556499_s_at	COL1A1	collagen, type I, alpha 1	5e-07	6.82e-06	31.09	15.87	1.96	up
228284_at	TLE1	transducin-like enhancer of split 1 (E(sp1) homolog, Drosophila)	0.000174788	0.000179677	81.89	40.18	2.04	up
208650_s_at	CD24	CD24 molecule	7.37995e-08	8.44243e-08	1348.05	682.39	1.98	up
208883_at	UBR5	ubiquitin protein ligase E3 component n-recognin 5	3.71e-05	0.000246	11.5	21.5	0.54	down
213107_at	TNIK	TRAF2 and NCK interacting kinase	1e-07	1.69e-06	32.15	57.94	0.55	down
201370_s_at	CUL3	cullin 3	4e-07	5.59e-06	53.3	137.06	0.39	down
203542_s_at	KLF9	Kruppel-like factor 9	0.0093365	0.0238	55.44	90.4	0.61	down
231777_at	CSNK2B	casein kinase 2, beta polypeptide	0.0001435	0.00076	412.86	105.91	3.9	up
238545_at	BRD7	Bromodomain containing 7	8e-07	1.01e-05	400.67	217.14	1.85	up
233314_at	PTEN	phosphatase and tensin homolog	4.2e-06	3.96e-05	16.36	10.01	1.63	up
234411_x_at	CD44	CD44 molecule (Indian blood group)	0.0005604	0.00236	157.33	92.61	1.7	up
213668_s_at	SOX4	SRY (sex determining region Y)-box 4	1.03029e-13	1.95422e-13	35.3	73.95	0.48	down
229010_at	CBL	Cas-Br-M (murine) ecotropic retroviral transforming sequence	0	0	158.59	71.41	2.22	up
228950_s_at	WLS	wntless homolog (Drosophila)	0.00111	0.00412	37.73	17.38	2.17	up
226065_at	PRICKLE1	prickle homolog 1 (Drosophila)	0.0013768	0.00491	55.82	32.36	1.73	up
204270_at	SKI	v-ski sarcoma viral oncogene homolog (avian)	0.0215131	0.0474	1018.26	1653.93	0.62	down
201867_s_at	TBL1X	transducin (beta)-like 1X-linked	4.07e-05	0.000267	64.88	26.52	2.45	up
227608_at	YY1AP1	YY1 associated protein 1	0.0047256	0.0137	78.59	32.8	2.4	up
212073_at	CSNK2A1	casein kinase 2, alpha 1 polypeptide	4.90369e-08	5.81325e-08	44.32	139.32	0.32	down
231920_s_at	CSNK1G1	casein kinase 1, gamma 1	1.1e-06	1.3e-05	23.47	10.21	2.3	up
236259_at	STK4	serine/threonine kinase 4	0	0	20.97	52.93	0.4	down
226010_at	SLC25A23	solute carrier family 25 (mitochondrial carrier; phosphate carrier), member 23	0.0001417	0.000751	89.68	44.56	2.01	up
231798_at	NOG	noggin	0.0002813	0.00133	104.98	64.64	1.62	up
