# Supplementary material for: CD4 T-cell transcriptome analysis reveals aberrant regulation of STAT3 and Wnt signaling pathways in rheumatoid arthritis: evidence from a case–control study
Source: Arthritis Res Ther. 2015 Mar 22;17(1):76. doi: 10.1186/s13075-015-0590-9 (PMC4392874; doi:10.1186/s13075-015-0590-9)
Supplement: Additional file 10: Table S10. — A table listing the gene modules involved in gene-gene interaction networks. [file 13075_2015_590_MOESM10_ESM.xls]

## Sheet: Gene-gene network analysis
Gene symbol	Description	betweenness centrality	degree	UPorDOWN
PIK3R1	phosphoinositide-3-kinase, regulatory subunit 1 (alpha)	0.993736	16	down
HSP90AA1	heat shock protein 90kDa alpha (cytosolic), class A member 1	0.665534	66	down
SPEN	spen homolog, transcriptional regulator (Drosophila)	0.634751	36	down
HNRNPA2B1	heterogeneous nuclear ribonucleoprotein A2/B1	0.548739	63	up
VIM	vimentin	0.534267	65	down
FUBP1	Far upstream element (FUSE) binding protein 1	0.455065	47	down
HSP90AB1	heat shock protein 90kDa alpha (cytosolic), class B member 1	0.451773	65	up
PAK1	p21 protein (Cdc42/Rac)-activated kinase 1	0.439714	51	up
MAPK1	mitogen-activated protein kinase 1	0.392775	13	up
TLE1	transducin-like enhancer of split 1 (E(sp1) homolog, Drosophila)	0.383896	3	up
VHL	von Hippel-Lindau tumor suppressor	0.308759	5	up
CBL	Cas-Br-M (murine) ecotropic retroviral transforming sequence	0.297261	11	up
CTTN	cortactin	0.284286	50	up
CSNK2A1	casein kinase 2, alpha 1 polypeptide	0.251027	11	down
PIK3CA	Phosphoinositide-3-kinase, catalytic, alpha polypeptide	0.242343	4	up
HIPK2	homeodomain interacting protein kinase 2	0.233766	4	up
BRD2	bromodomain containing 2	0.232208	35	up
CHAF1A	chromatin assembly factor 1, subunit A (p150)	0.232208	2	up
PKN2	protein kinase N2	0.213934	61	down
RPS6KB1	ribosomal protein S6 kinase, 70kDa, polypeptide 1	0.171962	6	down
PABPC1	Poly(A) binding protein, cytoplasmic 1	0.168388	49	down
PTPRC	protein tyrosine phosphatase, receptor type, C	0.164614	6	up
MAPK8	mitogen-activated protein kinase 8	0.162896	6	down
SYK	spleen tyrosine kinase	0.147912	6	up
ZAP70	zeta-chain (TCR) associated protein kinase 70kDa	0.10961	7	down
THRAP3	thyroid hormone receptor associated protein 3	0.100359	107	up
MAP3K2	mitogen-activated protein kinase kinase kinase 2	0.0993159	4	down
COL1A1	collagen, type I, alpha 1	0.0991258	3	up
FAM91A1	family with sequence similarity 91, member A1	0.0983632	47	down
IQGAP1	IQ motif containing GTPase activating protein 1	0.0976556	60	up
JAK2	Janus kinase 2	0.0963983	4	up
SMURF1	SMAD specific E3 ubiquitin protein ligase 1	0.0945174	5	down
TPR	translocated promoter region (to activated MET oncogene)	0.0940462	36	up
PRKAA1	protein kinase, AMP-activated, alpha 1 catalytic subunit	0.09183	2	down
RSBN1	round spermatid basic protein 1	0.0912759	5	up
DHX9	DEAH (Asp-Glu-Ala-His) box polypeptide 9	0.0888908	91	down
FASN	fatty acid synthase	0.0885251	100	down
INSR	insulin receptor	0.0883503	9	up
MED1	mediator complex subunit 1	0.0874993	8	down
ANXA2	annexin A2	0.0824658	5	up
CD44	CD44 molecule (Indian blood group)	0.0805195	3	up
EIF3B	eukaryotic translation initiation factor 3, subunit B	0.0804122	65	up
ANAPC5	anaphase promoting complex subunit 5	0.0794113	3	up
SIN3B	SIN3 homolog B, transcription regulator (yeast)	0.0784416	2	up
TRIM33	tripartite motif-containing 33	0.0784416	2	down
NR4A2	nuclear receptor subfamily 4, group A, member 2	0.0784416	2	down
GNAQ	guanine nucleotide binding protein (G protein), q polypeptide	0.0784416	2	up
PTEN	phosphatase and tensin homolog	0.0784416	2	up
ATXN1	ataxin 1	0.0760582	6	up
C1QBP	complement component 1, q subcomponent binding protein	0.0735208	29	down
SOCS3	suppressor of cytokine signaling 3	0.0731638	1	down
NOLC1	nucleolar and coiled-body phosphoprotein 1	0.0713788	48	up
SOCS1	suppressor of cytokine signaling 1	0.0694081	5	up
RBM4	RNA binding motif protein 4	0.0664466	61	up
ZNF292	zinc finger protein 292	0.0664466	61	down
M6PR	mannose-6-phosphate receptor (cation dependent)	0.0663014	2	down
ROCK1	Rho-associated, coiled-coil containing protein kinase 1	0.0630001	98	up
HSP90B1	heat shock protein 90kDa beta (Grp94), member 1	0.062663	60	up
PSMD7	Proteasome (prosome, macropain) 26S subunit, non-ATPase, 7	0.0608219	3	down
TNPO1	transportin 1	0.0599832	38	down
LUC7L2	LUC7-like 2 (S. cerevisiae)	0.0590909	79	down
IFNAR1	interferon (alpha, beta and omega) receptor 1	0.0411409	4	up
CSNK2B	casein kinase 2, beta polypeptide	0.0294703	4	up
DYNC1LI2	dynein, cytoplasmic 1, light intermediate chain 2	0.0284121	59	up
SF3B14	Splicing factor 3B, 14 kDa subunit	0.0284121	59	down
DIDO1	death inducer-obliterator 1	0.0284121	59	up
CSTF3	cleavage stimulation factor, 3' pre-RNA, subunit 3, 77kDa	0.0284121	59	up
CCDC82	coiled-coil domain containing 82	0.0284121	59	down
HNRNPH1	heterogeneous nuclear ribonucleoprotein H1 (H)	0.0284121	59	down
AHNAK	AHNAK nucleoprotein	0.0284121	59	up
PRPF6	PRP6 pre-mRNA processing factor 6 homolog (S. cerevisiae)	0.0284121	59	up
KLF9	Kruppel-like factor 9	0.0284121	59	down
SMARCAD1	SWI/SNF-related, matrix-associated actin-dependent regulator of chromatin, subfamily a, containing DEAD/H box 1	0.0284121	59	up
BCLAF1	BCL2-associated transcription factor 1	0.0284121	59	down
NOG	noggin	0.0284121	59	up
ASAP1	ArfGAP with SH3 domain, ankyrin repeat and PH domain 1	0.0211222	3	down
IGF1R	insulin-like growth factor 1 receptor	0.0206319	6	up
SMCHD1	structural maintenance of chromosomes flexible hinge domain containing 1	0.0194915	96	down
OFD1	oral-facial-digital syndrome 1	0.0189041	2	down
HNRNPD	Heterogeneous nuclear ribonucleoprotein D (AU-rich element RNA binding protein 1, 37kDa)	0.0183113	48	down
ZNF644	zinc finger protein 644	0.0152162	35	down
PNN	pinin, desmosome associated protein	0.0139737	96	down
RBM17	RNA binding motif protein 17	0.0139737	96	up
PAK2	p21 protein (Cdc42/Rac)-activated kinase 2	0.0137837	5	up
ZEB1	zinc finger E-box binding homeobox 1	0.00680148	47	up
ZNF326	zinc finger protein 326	0.00680148	47	down
ILF3	interleukin enhancer binding factor 3, 90kDa	0.00680148	47	up
ARHGEF7	Rho guanine nucleotide exchange factor (GEF) 7	0.00610152	3	down
SMAD5	SMAD family member 5	0.00447143	4	up
PRKCB	protein kinase C, beta	0.00380245	2	up
CBX5	chromobox homolog 5 (HP1 alpha homolog, Drosophila)	0.00366928	5	down
HNRNPR	heterogeneous nuclear ribonucleoprotein R	0.00335898	77	up
ITGB2	integrin, beta 2 (complement component 3 receptor 3 and 4 subunit)	0.00325232	2	up
PACSIN1	protein kinase C and casein kinase substrate in neurons 1	0.00314788	1	up
PDK1	pyruvate dehydrogenase kinase, isozyme 1	0.00264535	2	up
HSPH1	heat shock 105kDa/110kDa protein 1	0.00210355	4	up
EIF4G1	eukaryotic translation initiation factor 4 gamma, 1	0.00168251	5	up
PPARD	peroxisome proliferator-activated receptor delta	0.00105298	2	down
UBR5	ubiquitin protein ligase E3 component n-recognin 5	0.00101516	2	down
SH3BP2	SH3-domain binding protein 2	0.00082684	3	up
PAG1	phosphoprotein associated with glycosphingolipid microdomains 1	0.00082684	2	up
PABPN1	poly(A) binding protein, nuclear 1	0.000809605	47	down
HNRNPA3	heterogeneous nuclear ribonucleoprotein A3	0.000809605	47	down
IFI16	interferon, gamma-inducible protein 16	0.000406926	2	down
