# Supplementary material for: CD4 T-cell transcriptome analysis reveals aberrant regulation of STAT3 and Wnt signaling pathways in rheumatoid arthritis: evidence from a case–control study
Source: Arthritis Res Ther. 2015 Mar 22;17(1):76. doi: 10.1186/s13075-015-0590-9 (PMC4392874; doi:10.1186/s13075-015-0590-9)
Supplement: Additional file 11: Table S11. — A table listing the gene modules involved in pathway network analysis. [file 13075_2015_590_MOESM11_ESM.xls]

## Sheet: Pathway network analysis
Gene symbol	Description	betweenness centrality	indegree	outdegree	degree	UPorDOWN
MAPK1	mitogen-activated protein kinase 1	0.997598	13	28	41	up
PIK3CA	Phosphoinositide-3-kinase, catalytic, alpha polypeptide	0.650892	31	26	48	up
PIK3R1	phosphoinositide-3-kinase, regulatory subunit 1 (alpha)	0.614547	30	26	47	down
KRAS	v-Ki-ras2 Kirsten rat sarcoma viral oncogene homolog	0.512645	18	9	25	down
PRKCB	protein kinase C, beta	0.478431	7	19	22	up
EGFR	epidermal growth factor receptor	0.477151	4	9	12
JAK2	Janus kinase 2	0.445094	14	7	21	up
VEGFA	vascular endothelial growth factor A	0.419252	4	3	7	up
PLCG1	phospholipase C, gamma 1	0.350266	6	5	8
CBL	Cas-Br-M (murine) ecotropic retroviral transforming sequence	0.306409	2	14	16	up
RAC1	ras-related C3 botulinum toxin substrate 1 (rho family, small GTP binding protein Rac1)	0.301581	6	8	14
GRB2	growth factor receptor-bound protein 2	0.292589	11	7	12	up
MAPK8	mitogen-activated protein kinase 8	0.247847	13	9	22	down
PTPN11	protein tyrosine phosphatase, non-receptor type 11	0.210699	5	4	6
MYC		0.195548	4	1	5
PAK1	p21 protein (Cdc42/Rac)-activated kinase 1	0.190039	3	5	8	up
IFNAR1	interferon (alpha, beta and omega) receptor 1	0.182974	4	3	7	up
STAT1	signal transducer and activator of transcription 1, 91kDa	0.181922	3	3	6
IRS1	insulin receptor substrate 1	0.159588	4	3	7
ELK1	ELK1, member of ETS oncogene family	0.134869	5	1	6
XIAP	X-linked inhibitor of apoptosis	0.134517	1	2	3
IFNG	interferon, gamma	0.126241	1	1	2
PRKCZ	protein kinase C, zeta	0.120014	6	3	7
ROCK1	Rho-associated, coiled-coil containing protein kinase 1	0.118519	4	4	7	up
MAP2K4	mitogen-activated protein kinase kinase 4	0.111718	3	5	8
MAP2K1	mitogen-activated protein kinase kinase 1	0.108719	1	6	7
ERBB2	v-erb-b2 erythroblastic leukemia viral oncogene homolog 2, neuro/glioblastoma derived oncogene homolog (avian)	0.0914347	7	2	7	up
PLA2G12A	phospholipase A2, group XIIA	0.0908188	4	5	8	down
PRKACA	protein kinase, cAMP-dependent, catalytic, alpha	0.0908188	4	5	8	up
PRKACB	protein kinase, cAMP-dependent, catalytic, beta	0.0853081	1	4	5
ZAP70	zeta-chain (TCR) associated protein kinase 70kDa	0.0842414	2	3	4	down
CASP3	caspase 3, apoptosis-related cysteine peptidase	0.0805684	3	3	3
SMAD2	SMAD family member 2	0.0771449	7	1	8	up
ARRB1	arrestin, beta 1	0.0763278	3	2	3
JUN	jun proto-oncogene	0.0660174	2	3	5
RASSF1	Ras association (RalGDS/AF-6) domain family member 1	0.0653779	2	1	3	up
PAK2	p21 protein (Cdc42/Rac)-activated kinase 2	0.0636204	2	7	9	up
SOCS3	suppressor of cytokine signaling 3	0.0622144	3	1	4	down
RBL1	retinoblastoma-like 1 (p107)	0.0622144	3	1	4	up
RBL2	retinoblastoma-like 2 (p130)	0.0573998	1	11	12	up
SOCS1	suppressor of cytokine signaling 1	0.0562366	1	10	11	up
LAT	linker for activation of T cells	0.0503326	5	4	6
RPS6KB1	ribosomal protein S6 kinase, 70kDa, polypeptide 1	0.0473425	5	1	6	down
FOS	FBJ murine osteosarcoma viral oncogene homolog	0.0469042	16	7	19
AKT1	v-akt murine thymoma viral oncogene homolog 1	0.0468001	4	2	6	up
INSR	insulin receptor	0.0434129	5	5	8
KLF9	Kruppel-like factor 9	0.0411409	4	2	5	down
PDPK1	3-phosphoinositide dependent protein kinase-1	0.0377907	7	3	8
MAP2K7	mitogen-activated protein kinase kinase 7	0.0374287	3	3	6
PLA2G2D	phospholipase A2, group IID	0.0370941	4	1	4
MAP3K2	mitogen-activated protein kinase kinase kinase 2	0.0330877	1	11	11	down
PRKCA	protein kinase C, alpha	0.0330404	1	1	2
PIP5K1C	phosphatidylinositol-4-phosphate 5-kinase, type I, gamma	0.0326889	1	1	2
ZEB1	zinc finger E-box binding homeobox 1	0.0324409	1	3	3	up
TNFSF10	tumor necrosis factor (ligand) superfamily, member 10	0.0323374	1	4	4
RASGRP1	RAS guanyl releasing protein 1 (calcium and DAG-regulated)	0.0323374	1	2	3
IL2RG	interleukin 2 receptor, gamma	0.0319859	4	1	5
CSNK2B	casein kinase 2, beta polypeptide	0.0302016	2	2	3	up
XCR1	chemokine (C motif) receptor 1	0.0284121	3	5	7
SOS1	son of sevenless homolog 1 (Drosophila)	0.0283693	3	6	7
FAM91A1	family with sequence similarity 91, member A1	0.0277531	3	2	5
ZNF292	zinc finger protein 292	0.0260407	2	1	3	down
TRIM33	tripartite motif-containing 33	0.0260407	2	1	3	down
CXCR1	chemokine (C-X-C motif) receptor 1	0.0260407	2	1	3
PIK3CG	phosphoinositide-3-kinase, catalytic, gamma polypeptide	0.0228906	8	4	11
CSNK2A1	casein kinase 2, alpha 1 polypeptide	0.020621	1	2	3	down
CDK4	cyclin-dependent kinase 4	0.020621	1	2	3
CX3CR1	chemokine (C-X3-C motif) receptor 1	0.0179596	1	2	2
STK4	serine/threonine kinase 4	0.0170425	2	1	2	down
CASP7	caspase 7, apoptosis-related cysteine peptidase	0.0161687	1	1	2
PRKAA1	protein kinase, AMP-activated, alpha 1 catalytic subunit	0.0161458	4	3	7	down
RRAS2	related RAS viral (r-ras) oncogene homolog 2	0.0161458	4	3	7	up
PDK1	pyruvate dehydrogenase kinase, isozyme 1	0.0152732	9	5	11	up
CCDC82	coiled-coil domain containing 82	0.0152162	7	4	12	down
ZNF644	zinc finger protein 644	0.0137837	3	4	7	down
RHOA	ras homolog gene family, member A	0.0104631	1	2	3
HNRNPA3	heterogeneous nuclear ribonucleoprotein A3	0.00693962	3	3	6	down
CSF2RB	colony stimulating factor 2 receptor, beta, low-affinity (granulocyte-macrophage)	0.00693962	3	3	6
IL3RA	interleukin 3 receptor, alpha (low affinity)	0.00693962	3	3	6
PPARD	peroxisome proliferator-activated receptor delta	0.00494476	3	4	5	down
TNF	tumor necrosis factor	0.00482994	1	1	2
LCP2	lymphocyte cytosolic protein 2 (SH2 domain containing leukocyte protein of 76kDa)	0.00373197	2	1	3
PLCB1	phospholipase C, beta 1 (phosphoinositide-specific)	0.003639	2	2	3
NOG	noggin	0.00277101	1	4	5	up
MRAS	muscle RAS oncogene homolog	0.00277101	1	2	3
